# Supplementary material
Source: MDPI journal article supplement (https://www.mdpi.com/2073-4433/13/9/1478)
Supplement: s1 [file s1 › atmosphere-1882482-supplementary.pdf]

*Supplementary Materials*

# **Evaluation of Present-Day CMIP6 Model Simulations of Extreme Precipitation and Temperature over the Australian Continent**

**Nidhi Nishant <sup>1,2,\*</sup>, Giovanni Di Virgilio <sup>1,2,3</sup>, Fei Ji <sup>2,3</sup>, Eugene Tam <sup>3</sup>, Kathleen Beyer <sup>3,4</sup> and Matthew L. Riley <sup>3</sup>**

<sup>1</sup> Climate Change Research Centre, University of New South Wales, Sydney, NSW 2052, Australia

<sup>2</sup> Australian Research Council Centre of Excellence for Climate Extremes, University of New South Wales, Sydney, NSW 2052, Australia

<sup>3</sup> Science, Economics and Insights Division, NSW Department of Planning and Environment, Sydney, NSW 2141, Australia

<sup>4</sup> School of Geography, Planning and Spatial Sciences, University of Tasmania, Hobart, TAS 7001, Australia

\* Correspondence: n.nidhi@unsw.edu.au

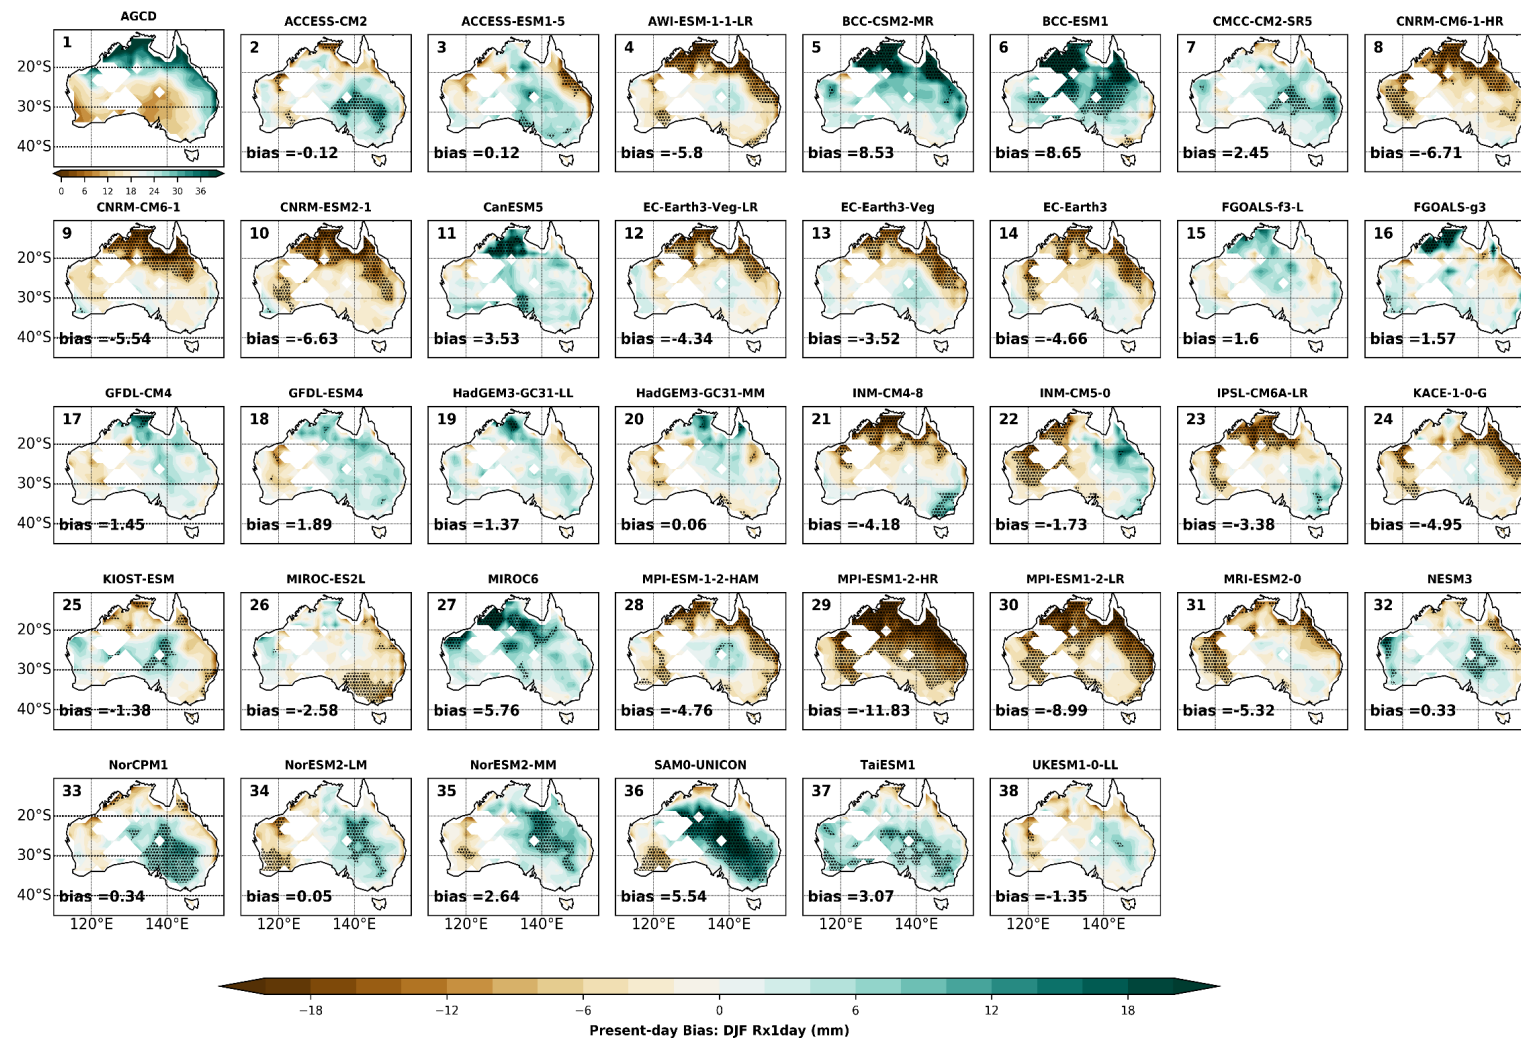

**Figure S1.** Climatological mean December-January-February bias in maximum 1-day precipitation (Rx1Day: mm) relative to Australian Gridded Climate Data dataset (AGCD; panel 1), for the individual CMIP6 GCMs (panels 2–38). Data spans 1951–2014. Stippling indicates statistically significant differences using a student's t-test at the 95% confidence level. The white mask in part of the inland domain are the regions with no station data.

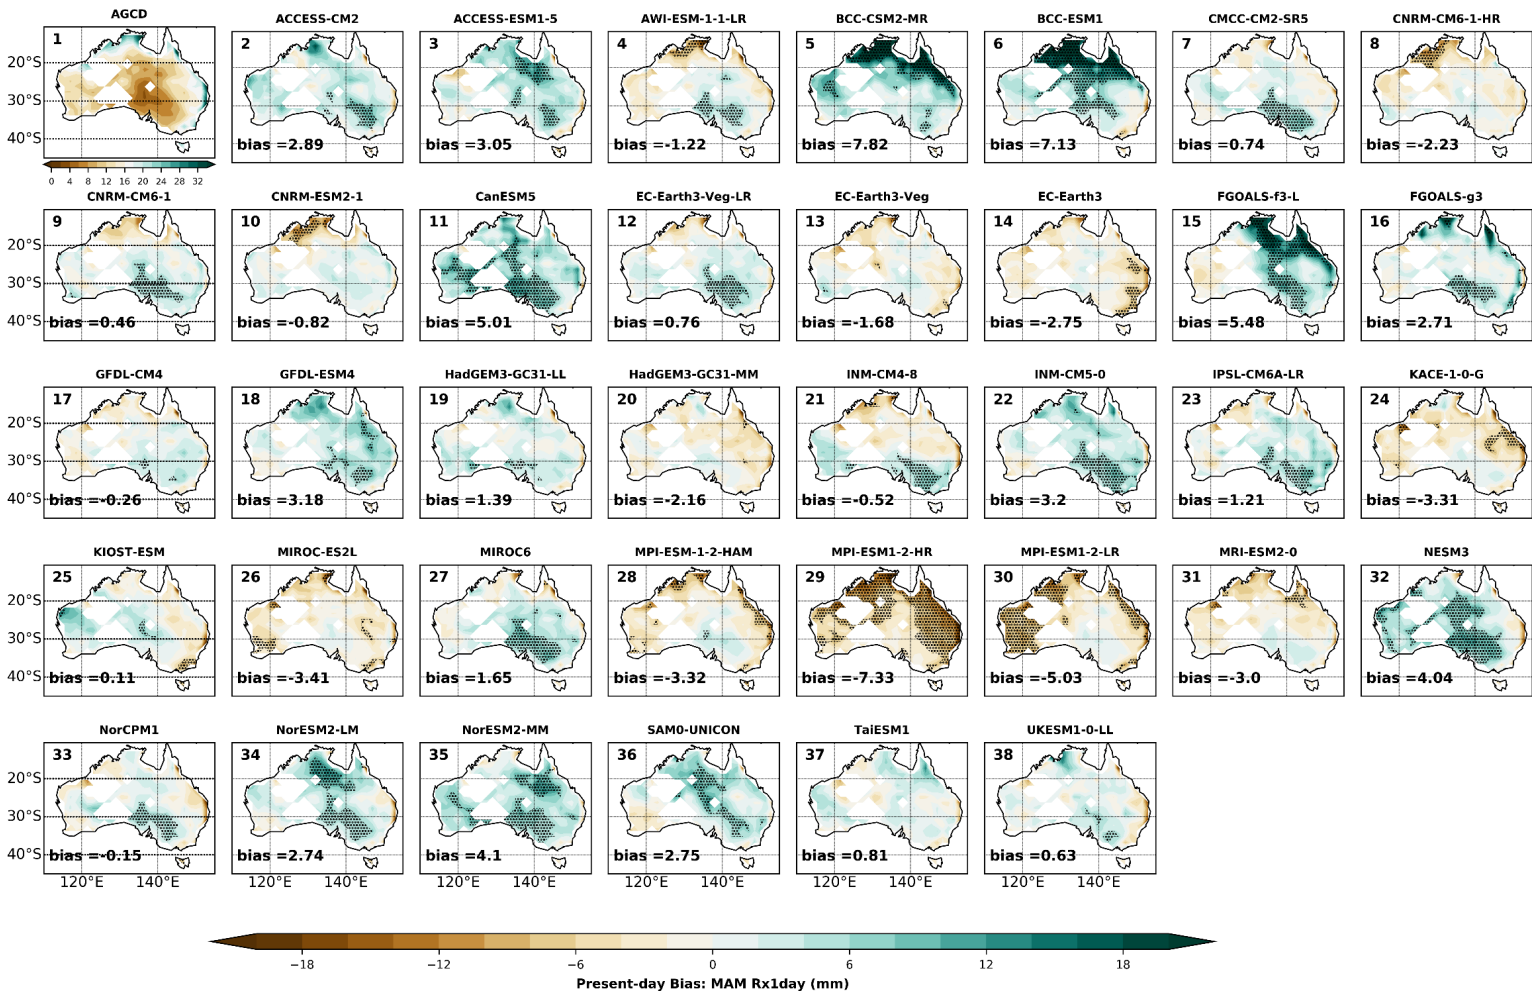

Figure S2. Same as S1 but for March-April-May.

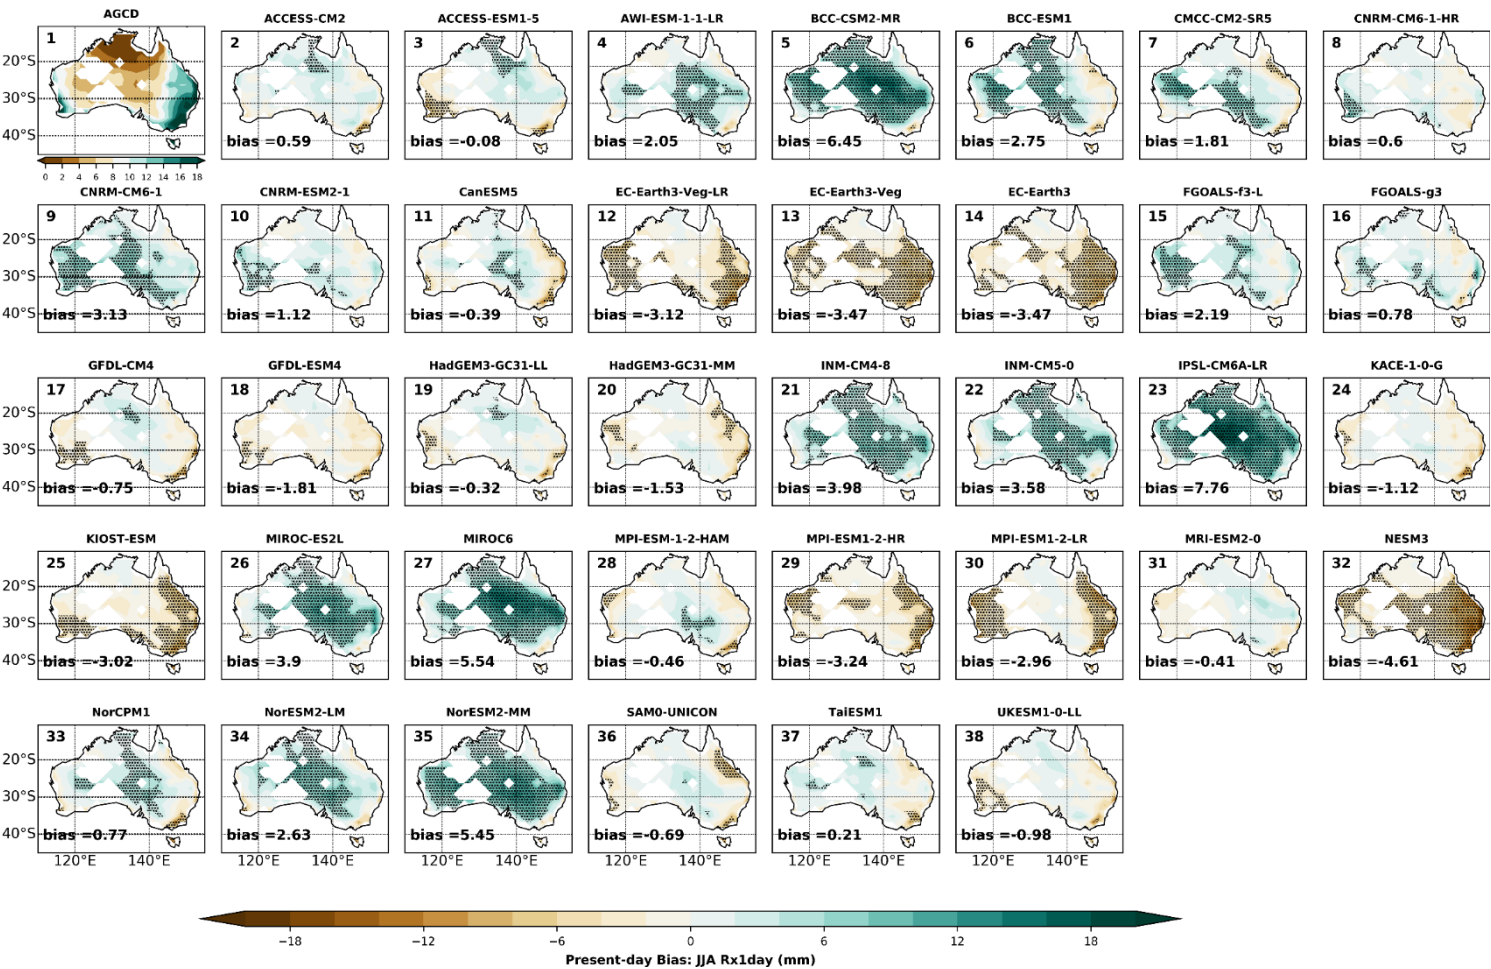

Figure S3. Same as S1 but for June-July-August.

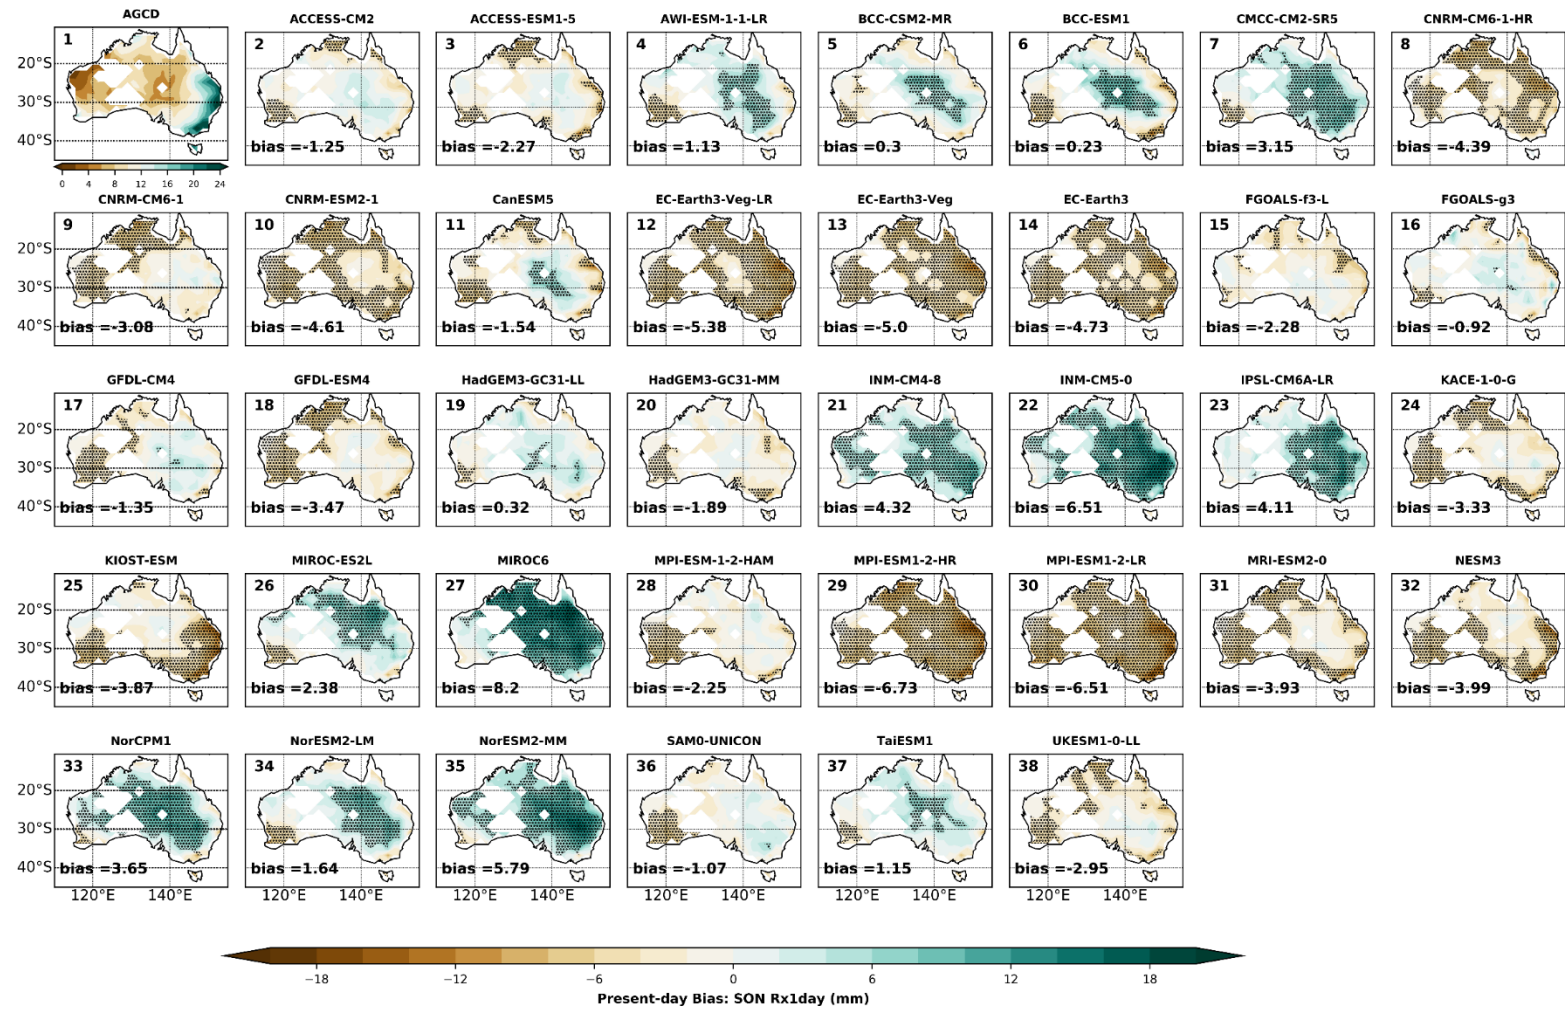

Figure S4. Same as S1 but for September-October-November.

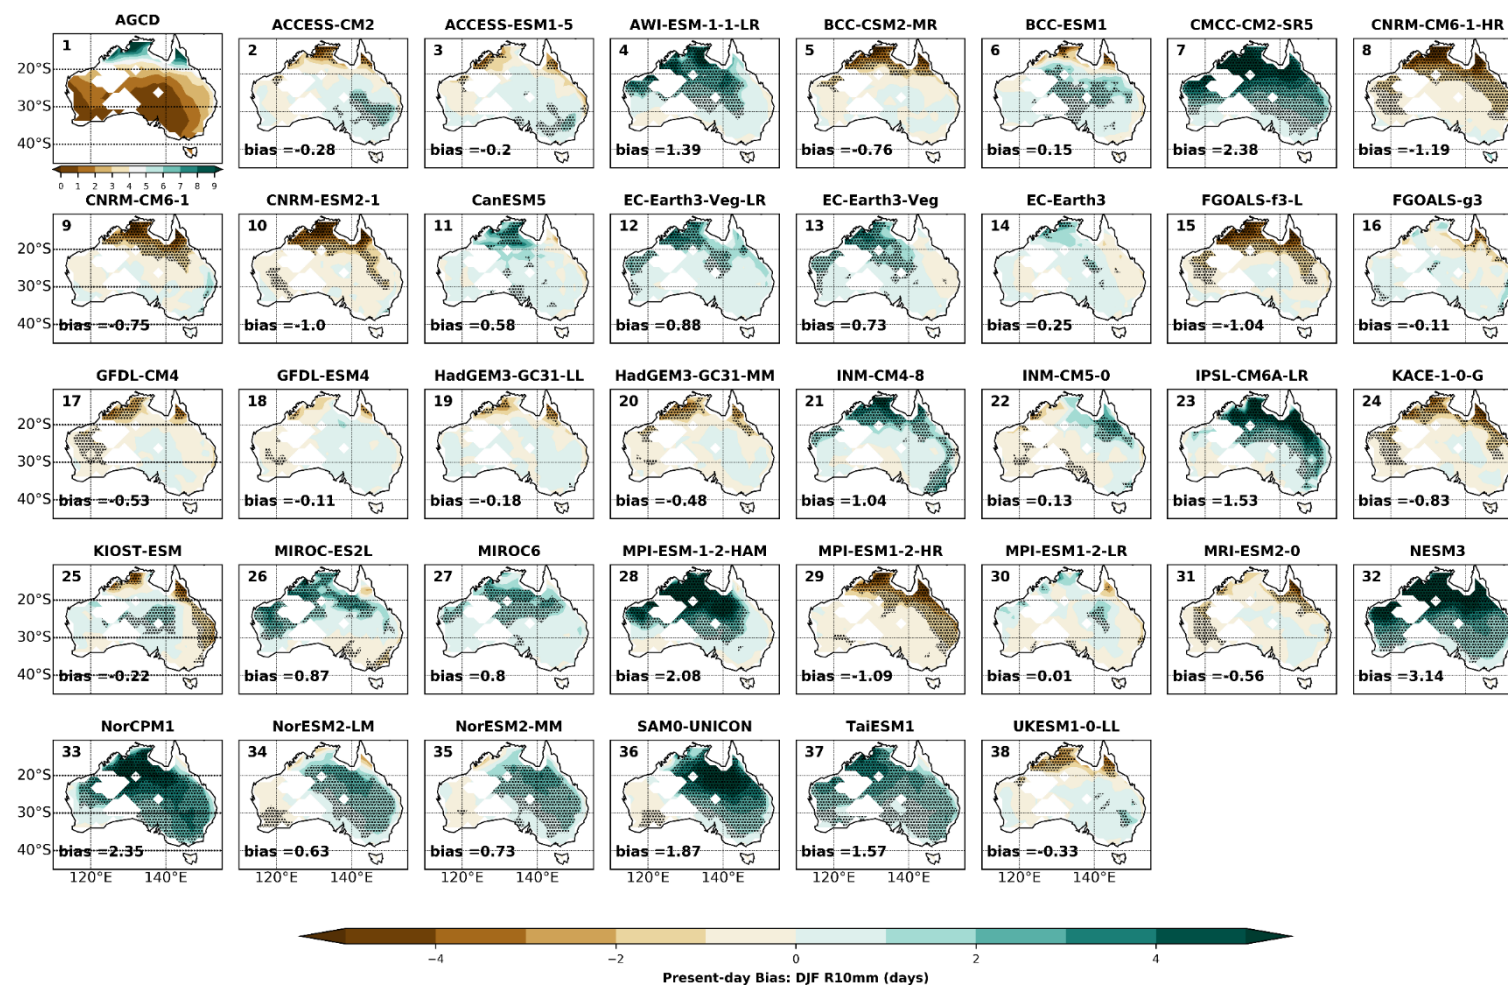

**Figure S5.** Climatological mean December-January-February bias in number of very heavy rain days (rain > 10 mm) (R10mm: days) relative to Australian Gridded Climate Data dataset (AGCD; panel 1), for the individual CMIP6 GCMs (panels 2–38). Data spans 1951–2014. Stippling indicates statistically significant differences using a student's t-test at the 95% confidence level. The white mask in part of the inland domain are the regions with no station data.

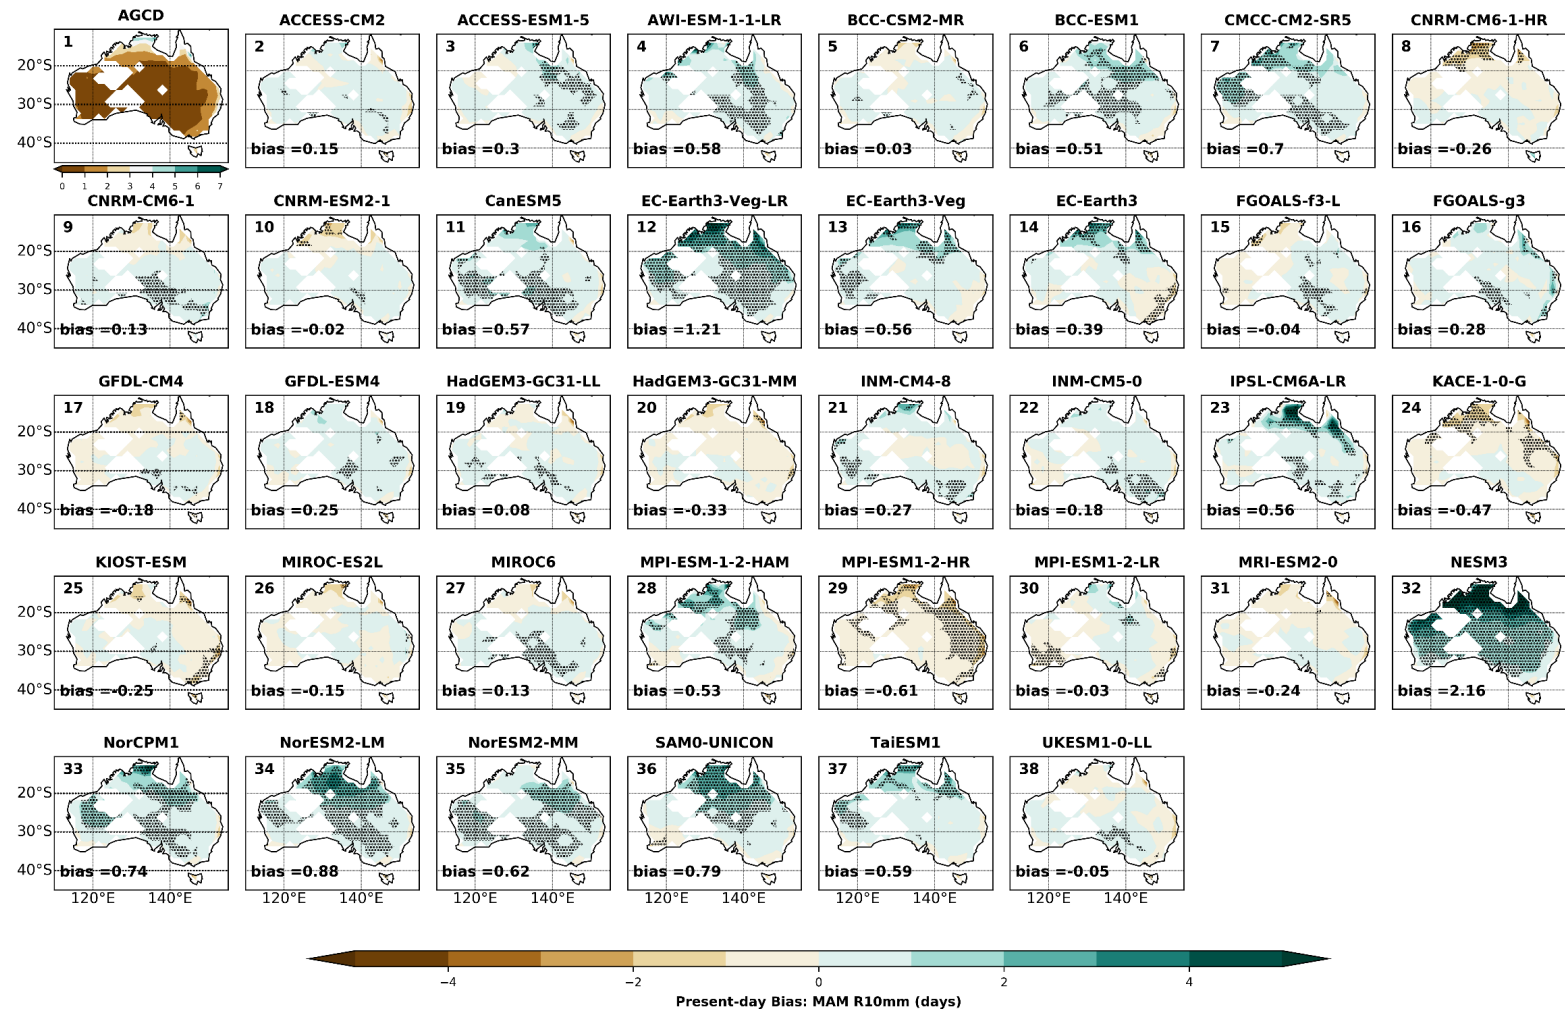

Figure S6. Same as S5 but for March-April-May.

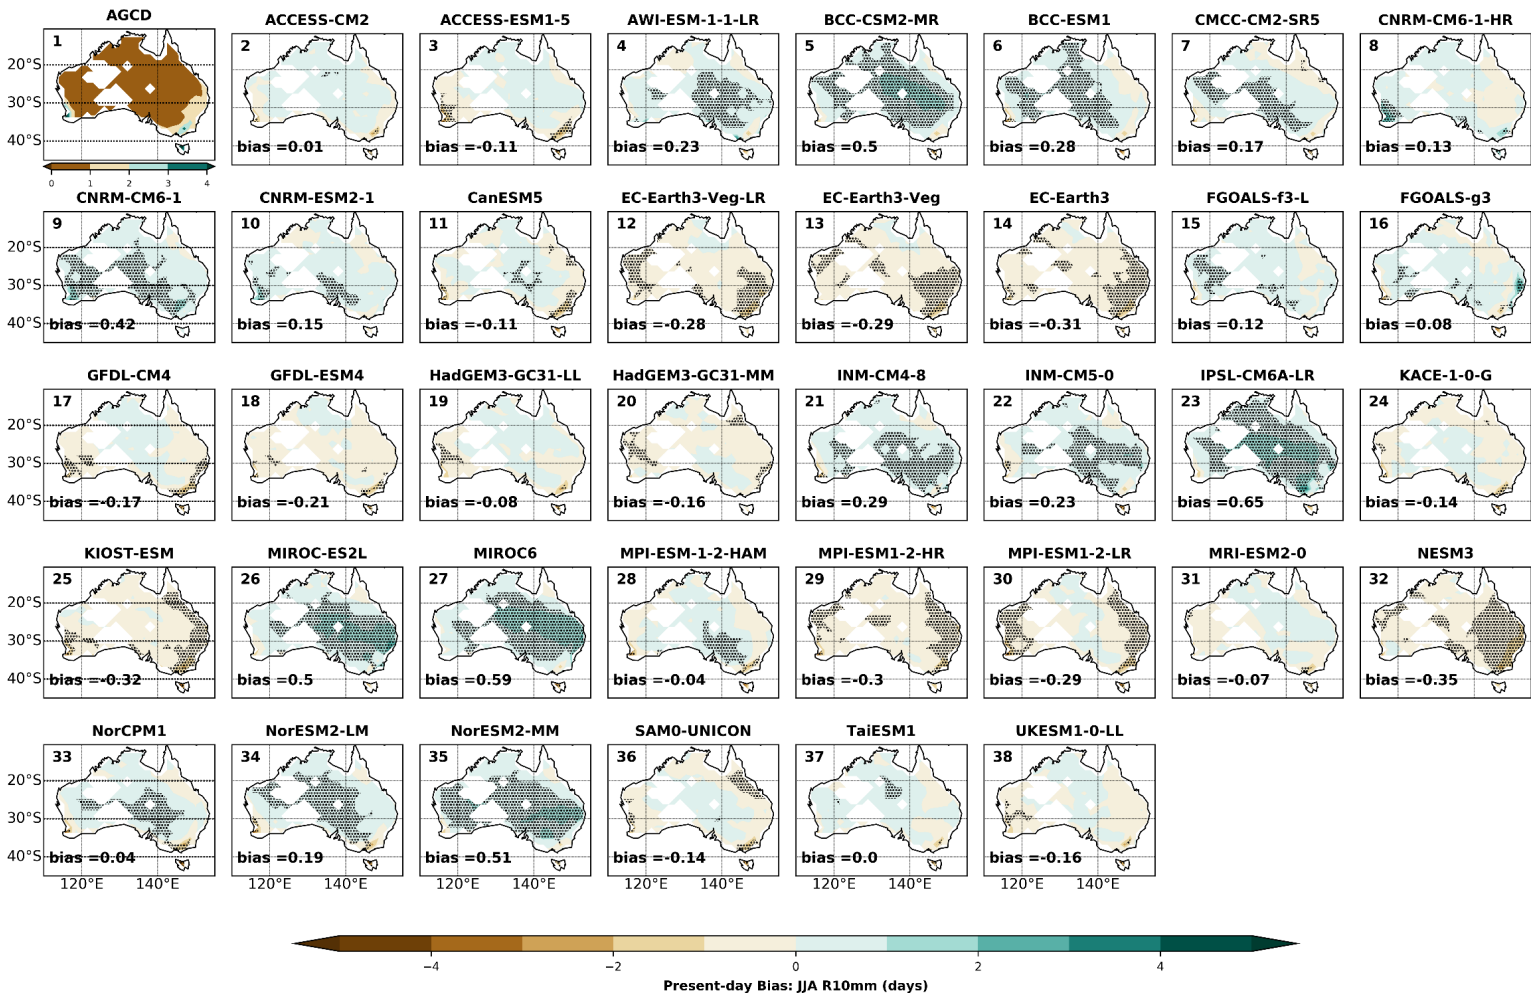

Figure S7. Same as S5 but for June-July-August.

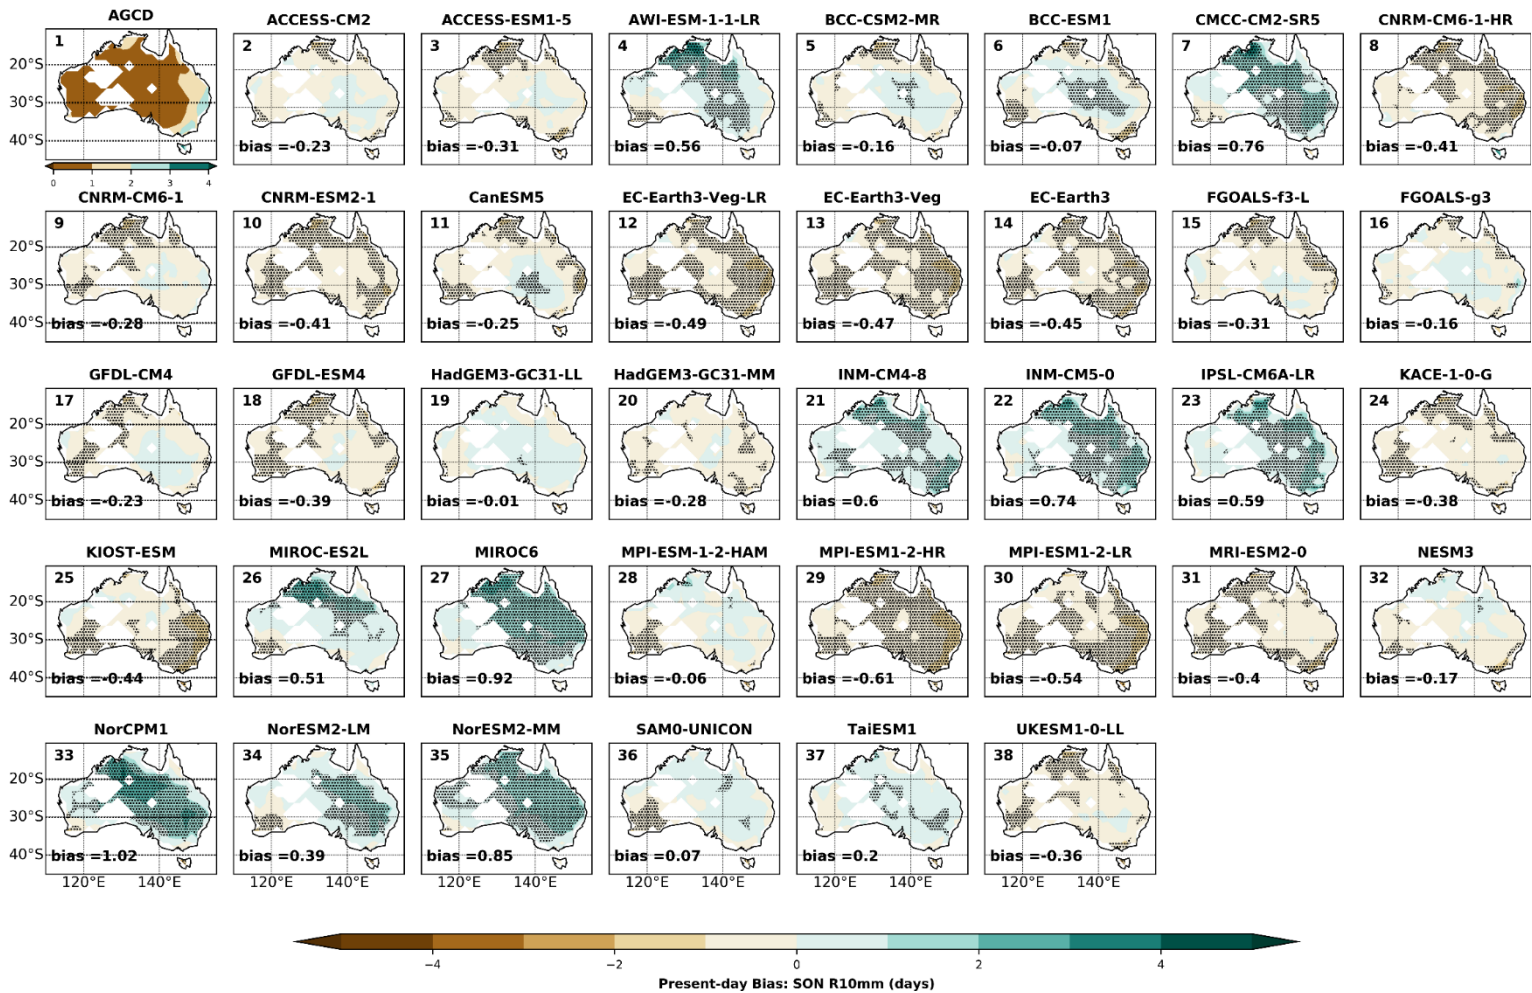

Figure S8. Same as S5 but for September-October-November.

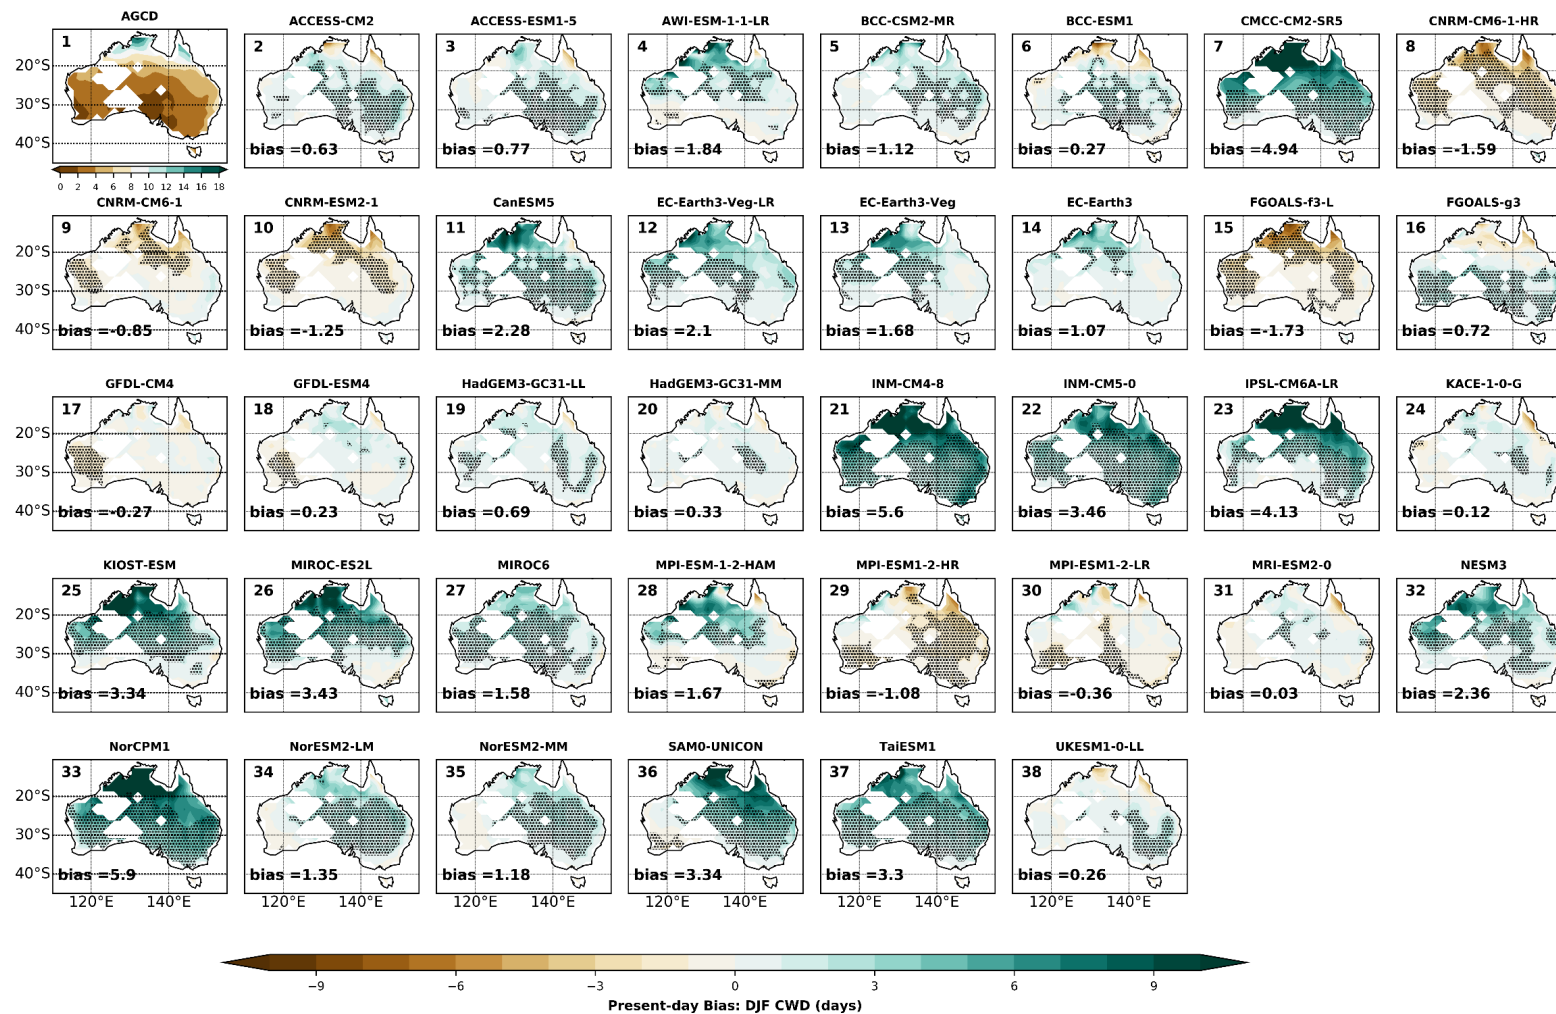

**Figure S9.** Climatological mean December-January-February bias in consecutive wet days (CWD: days) relative to Australian Gridded Climate Data dataset (AGCD; panel 1), for the individual CMIP6 GCMs (panels 2-38). Data spans 1951–2014. Stippling indicates statistically significant differences using a student's t-test at the 95% confidence level. The white mask in part of the inland domain are the regions with no station data.

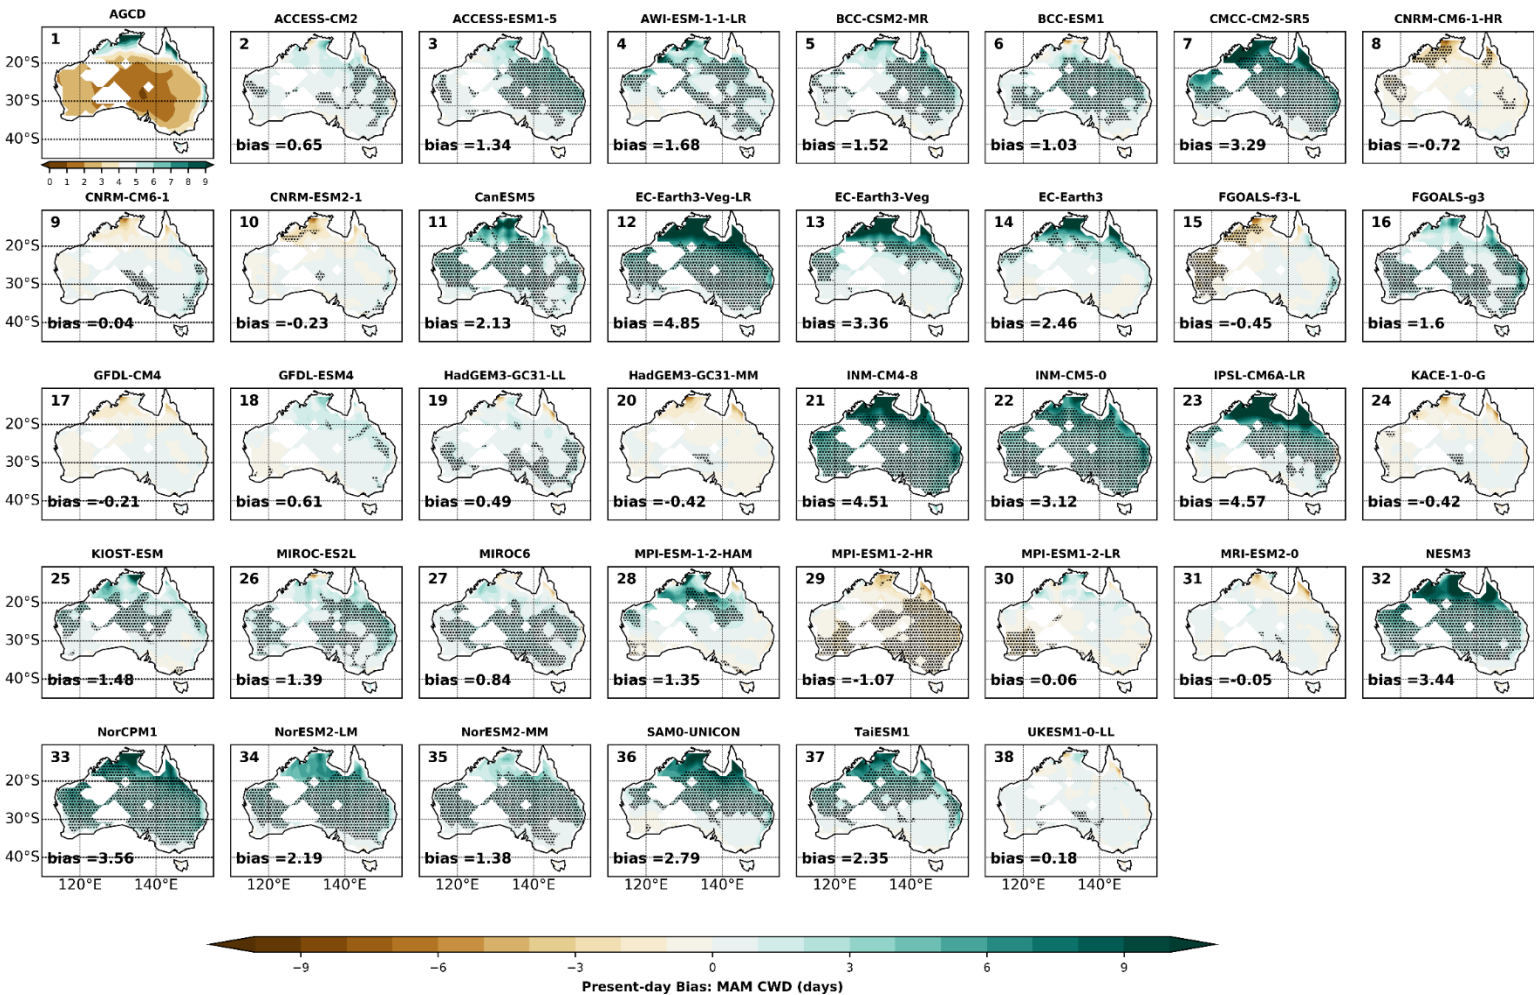

Figure S10. Same as S9 but for March-April-May.

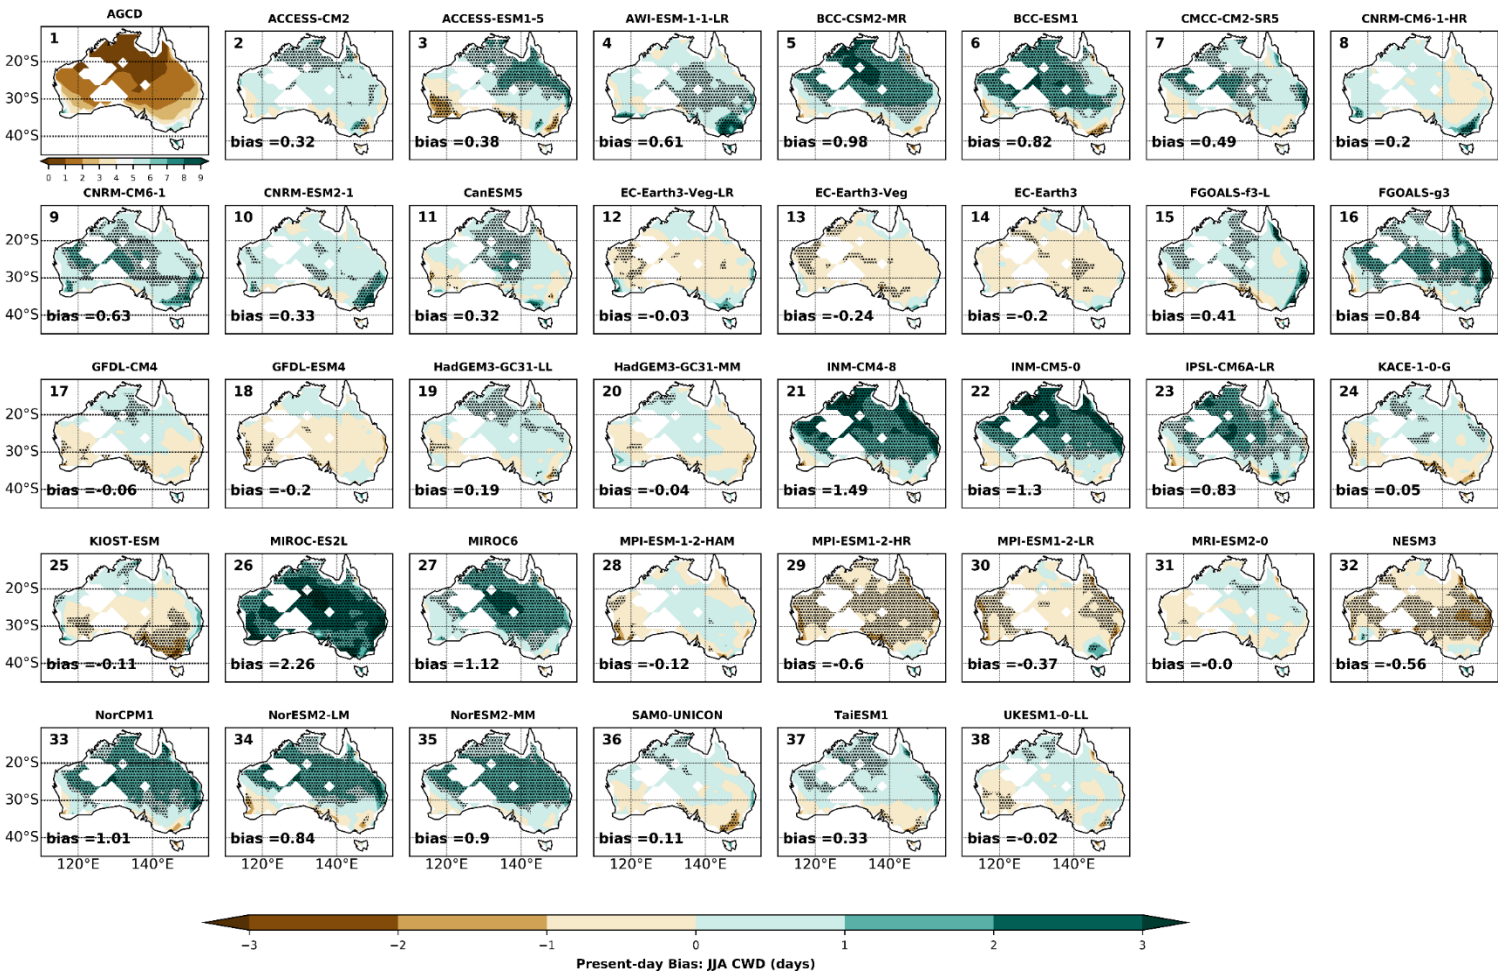

Figure S11. Same as S9 but for June-July-August.

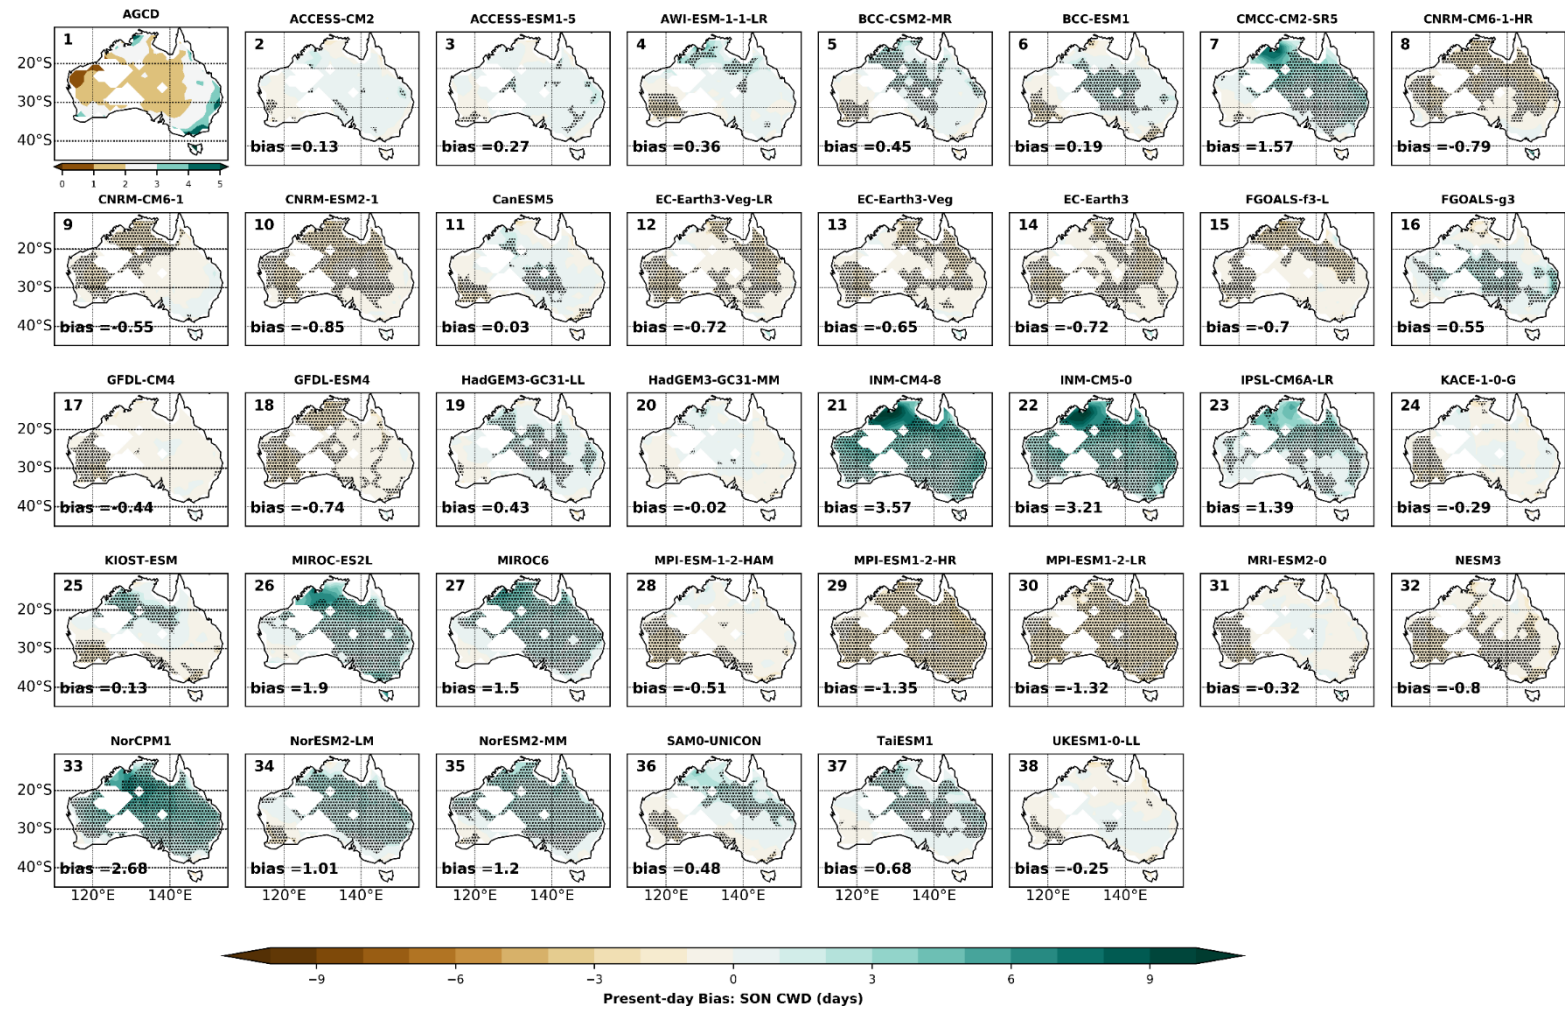

Figure S12. Same as S9 but for September-October-November.

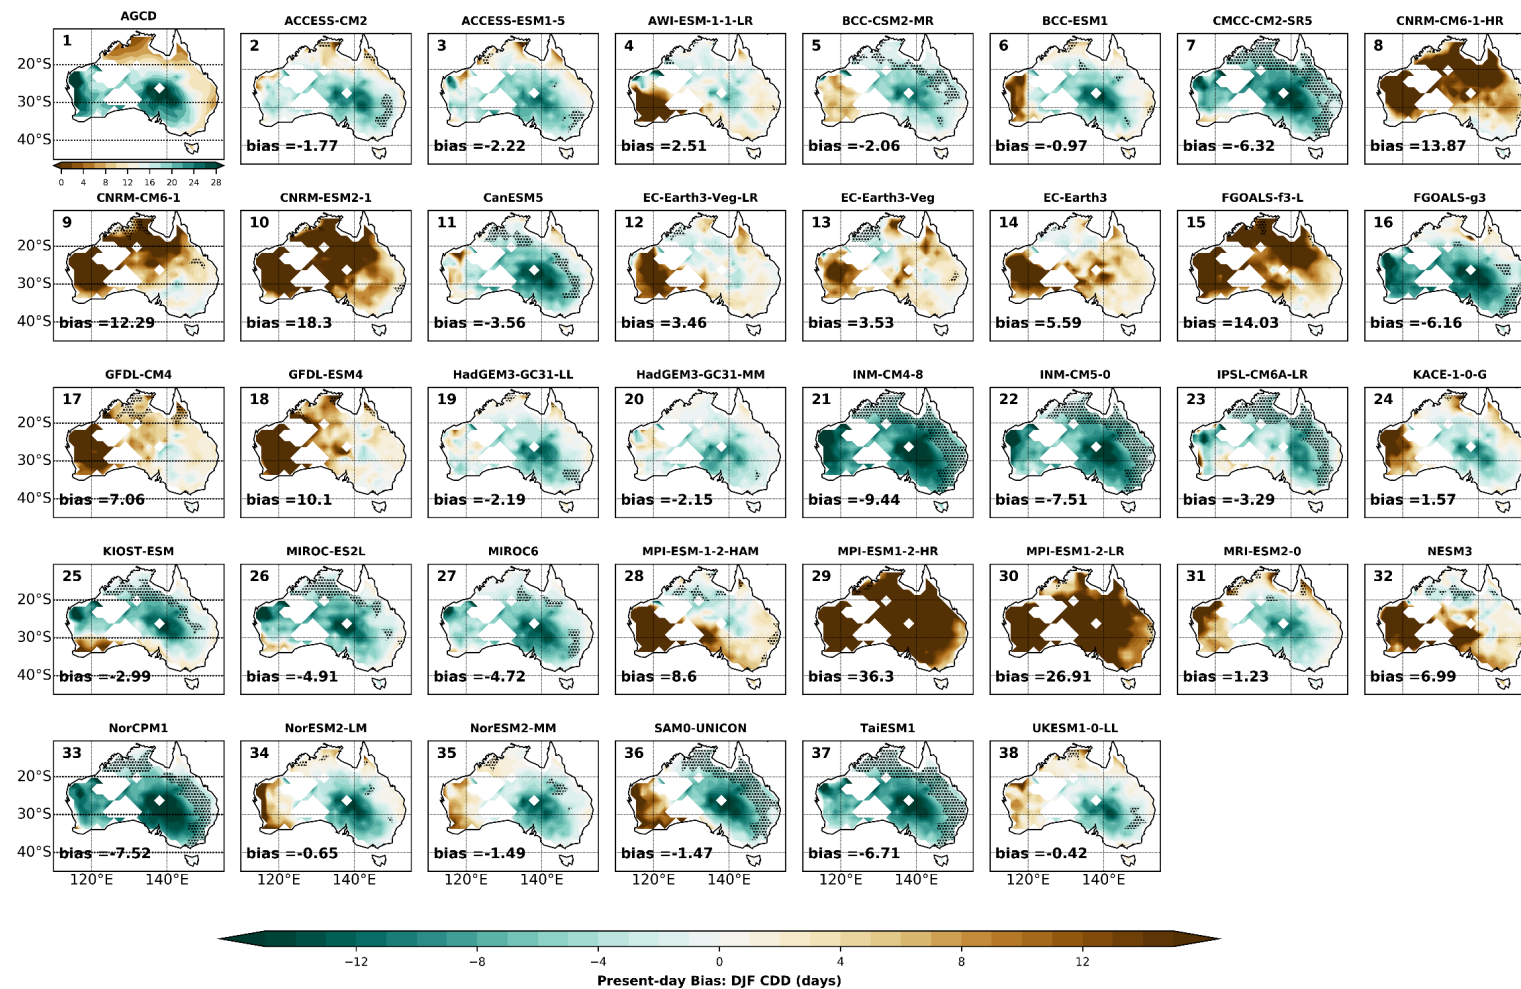

**Figure S13.** Climatological mean December-January-February bias in consecutive dry days (CDD: days) relative to Australian Gridded Climate Data dataset (AGCD; panel 1), for the individual CMIP6 GCMs (panels 2-38). Data spans 1951–2014. Stippling indicates statistically significant differences using a student's t-test at the 95% confidence level. The white mask in part of the inland domain are the regions with no station data.

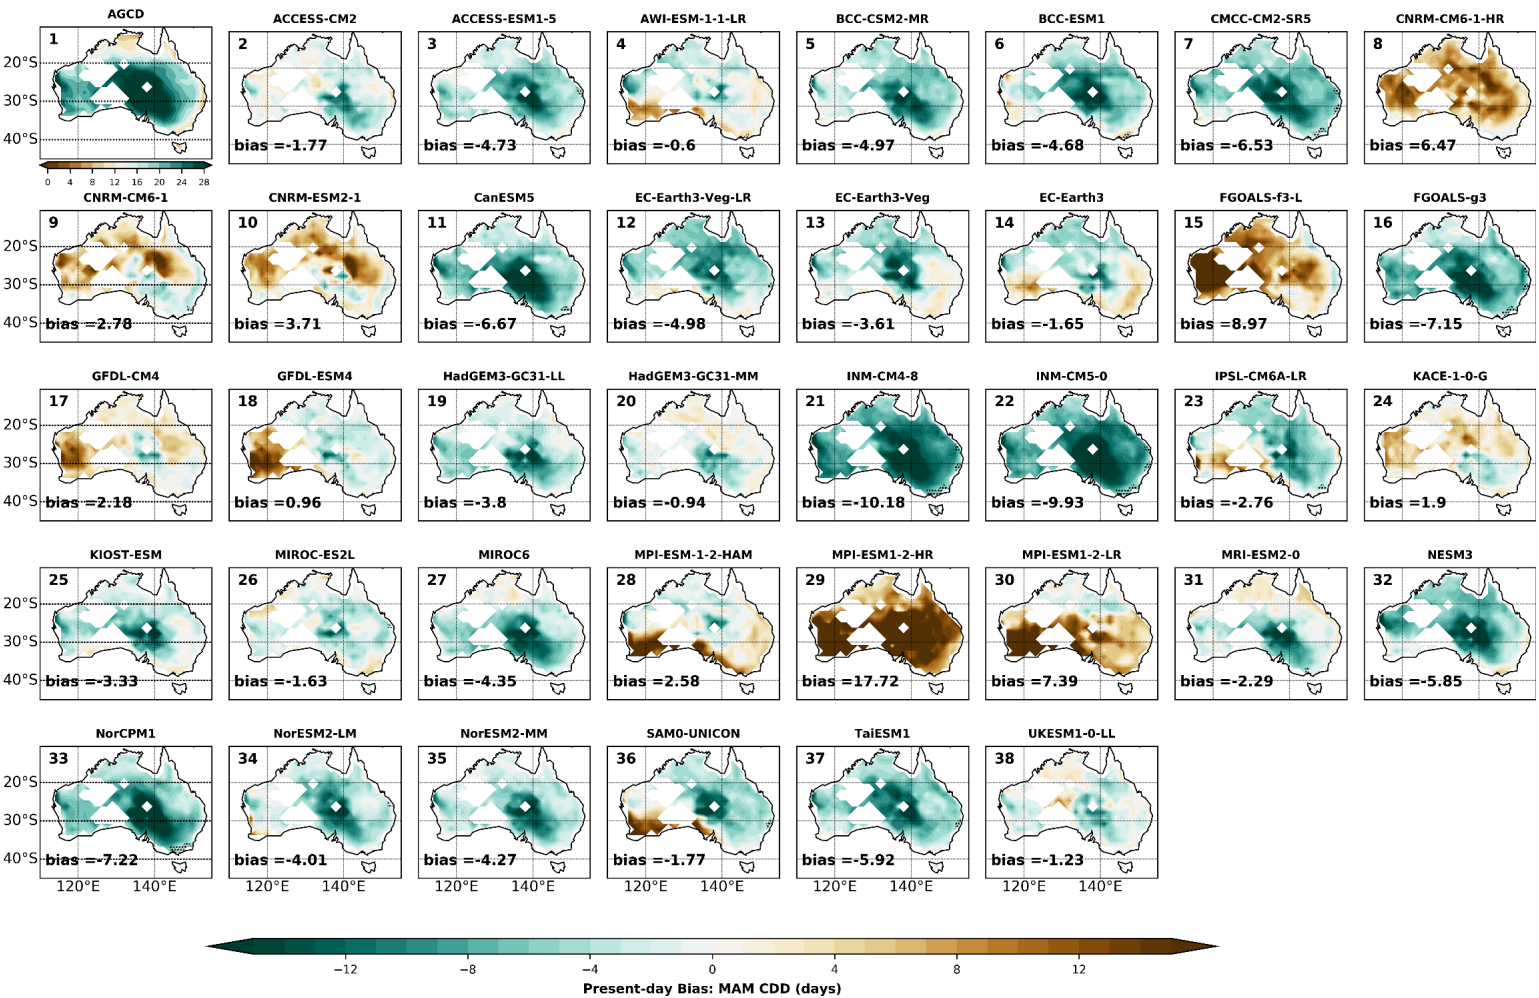

Figure S14. Same as S13 but for March-April-May.

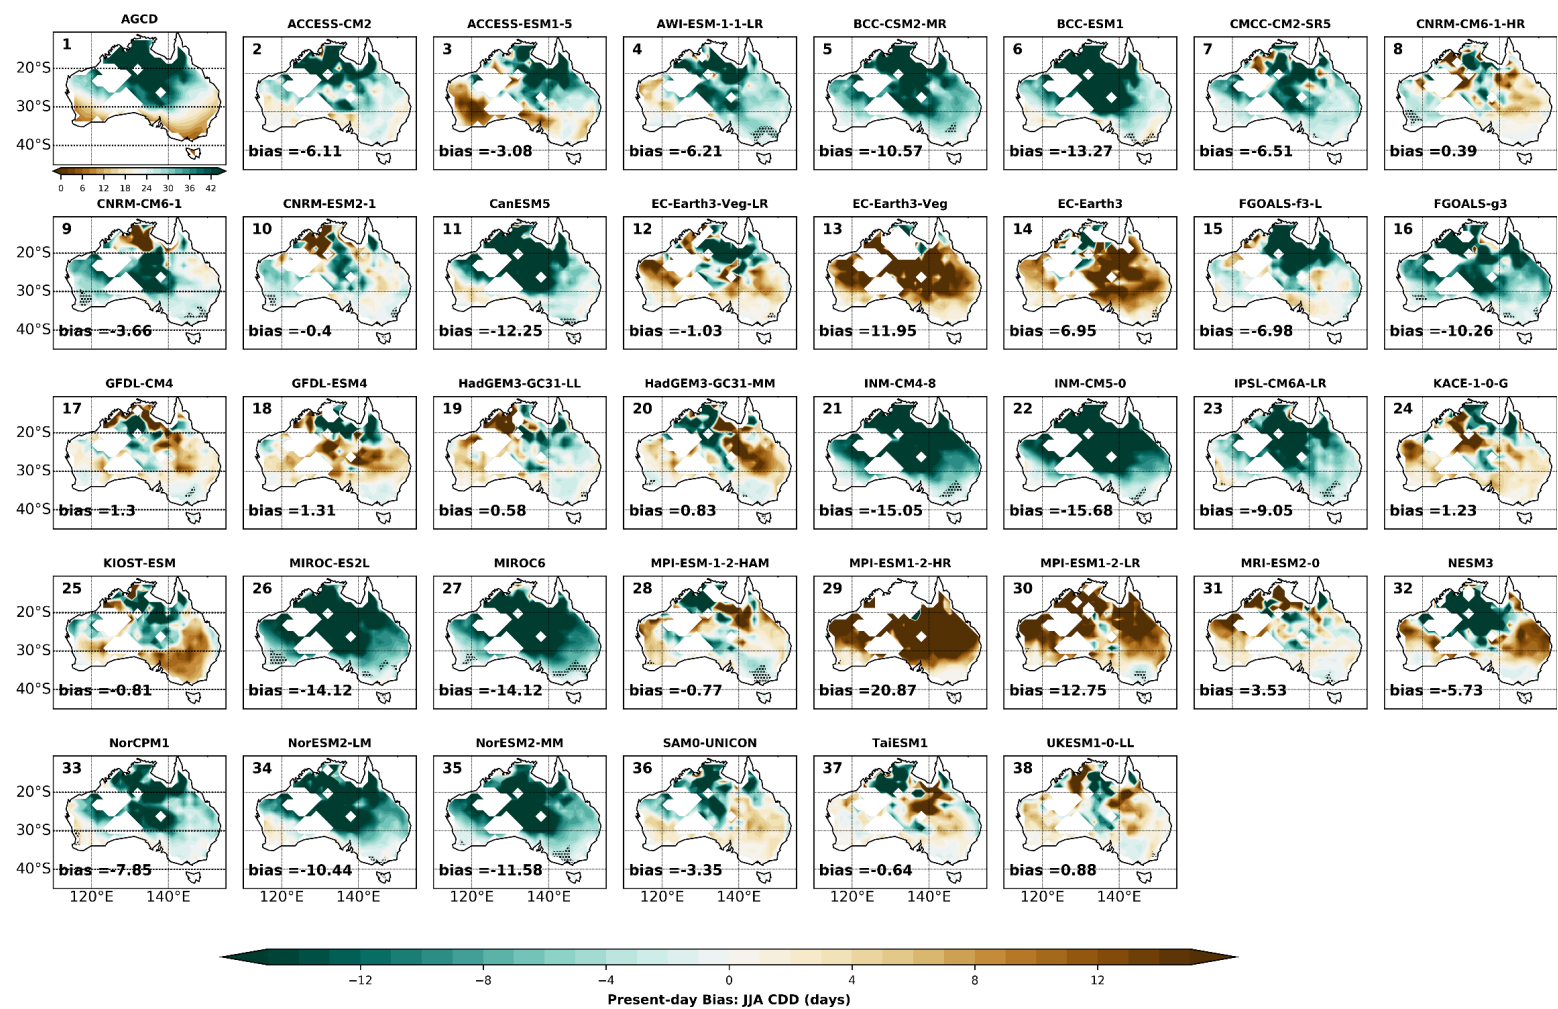

Figure S15. Same as S13 but for June-July-August.

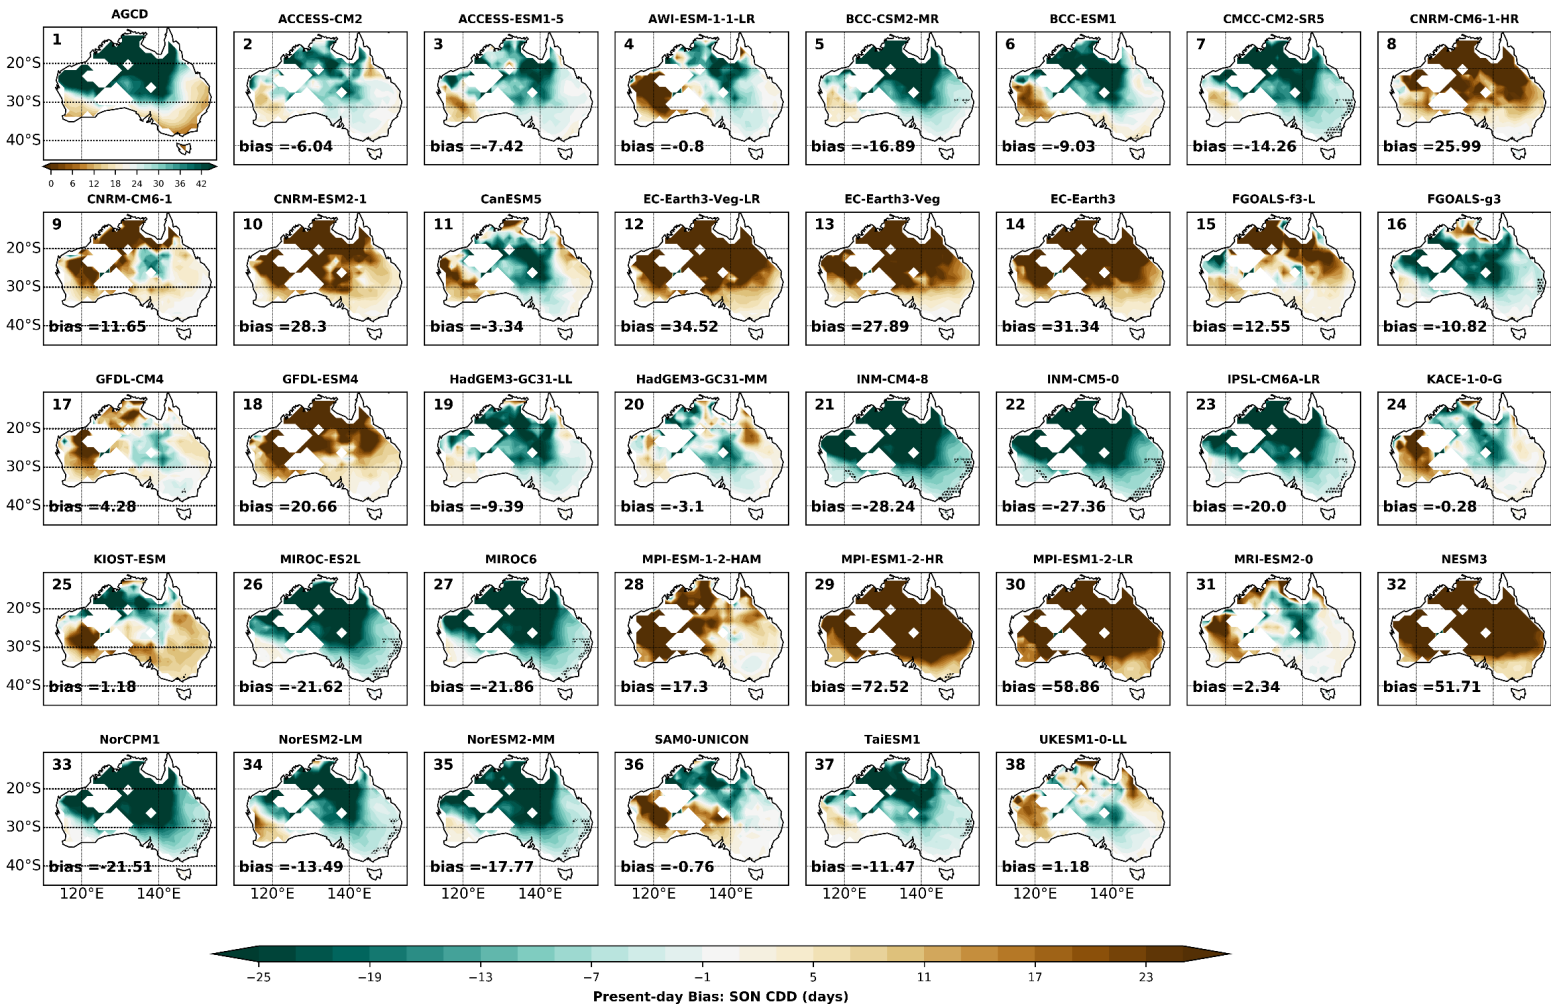

Figure S16. Same as S13 but for September-October-November.

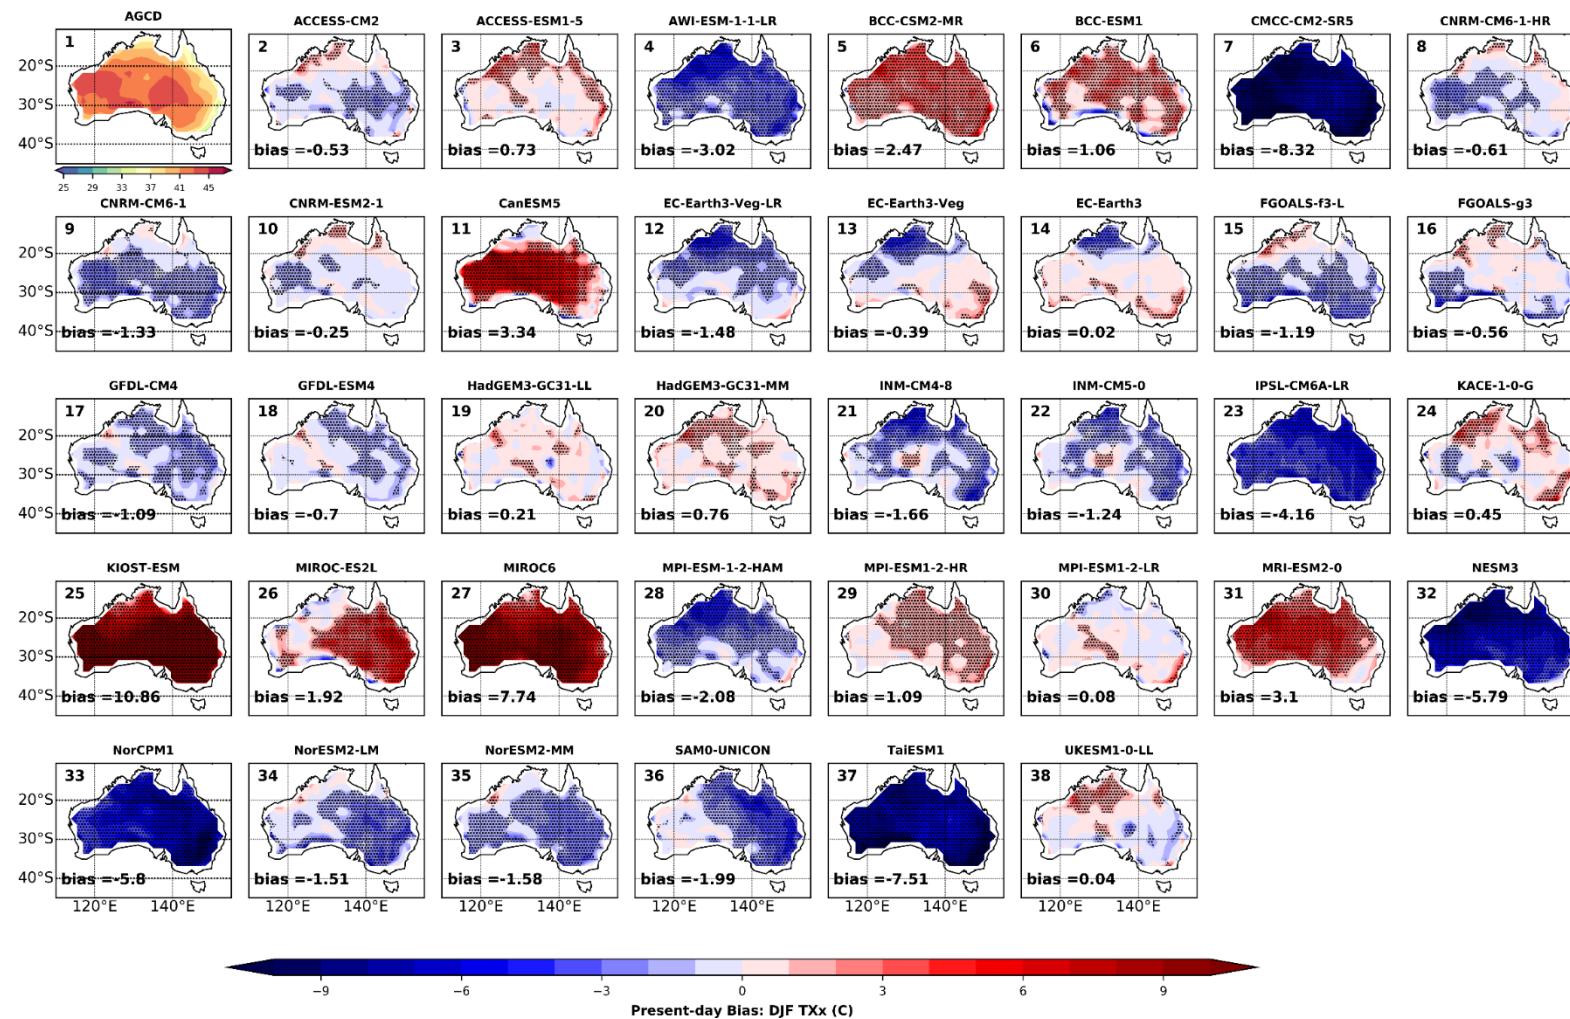

**Figure S17.** Climatological mean December-January-February bias in maximum maximum-temperature (TXx: °C) relative to Australian Gridded Climate Data dataset (AGCD; panel 1), for the individual CMIP6 GCMs (panels 2-38). Data spans 1951–2014. Stippling indicates statistically significant differences using a student's t-test at the 95% confidence level. The white mask in part of the inland domain are the regions with no station data.

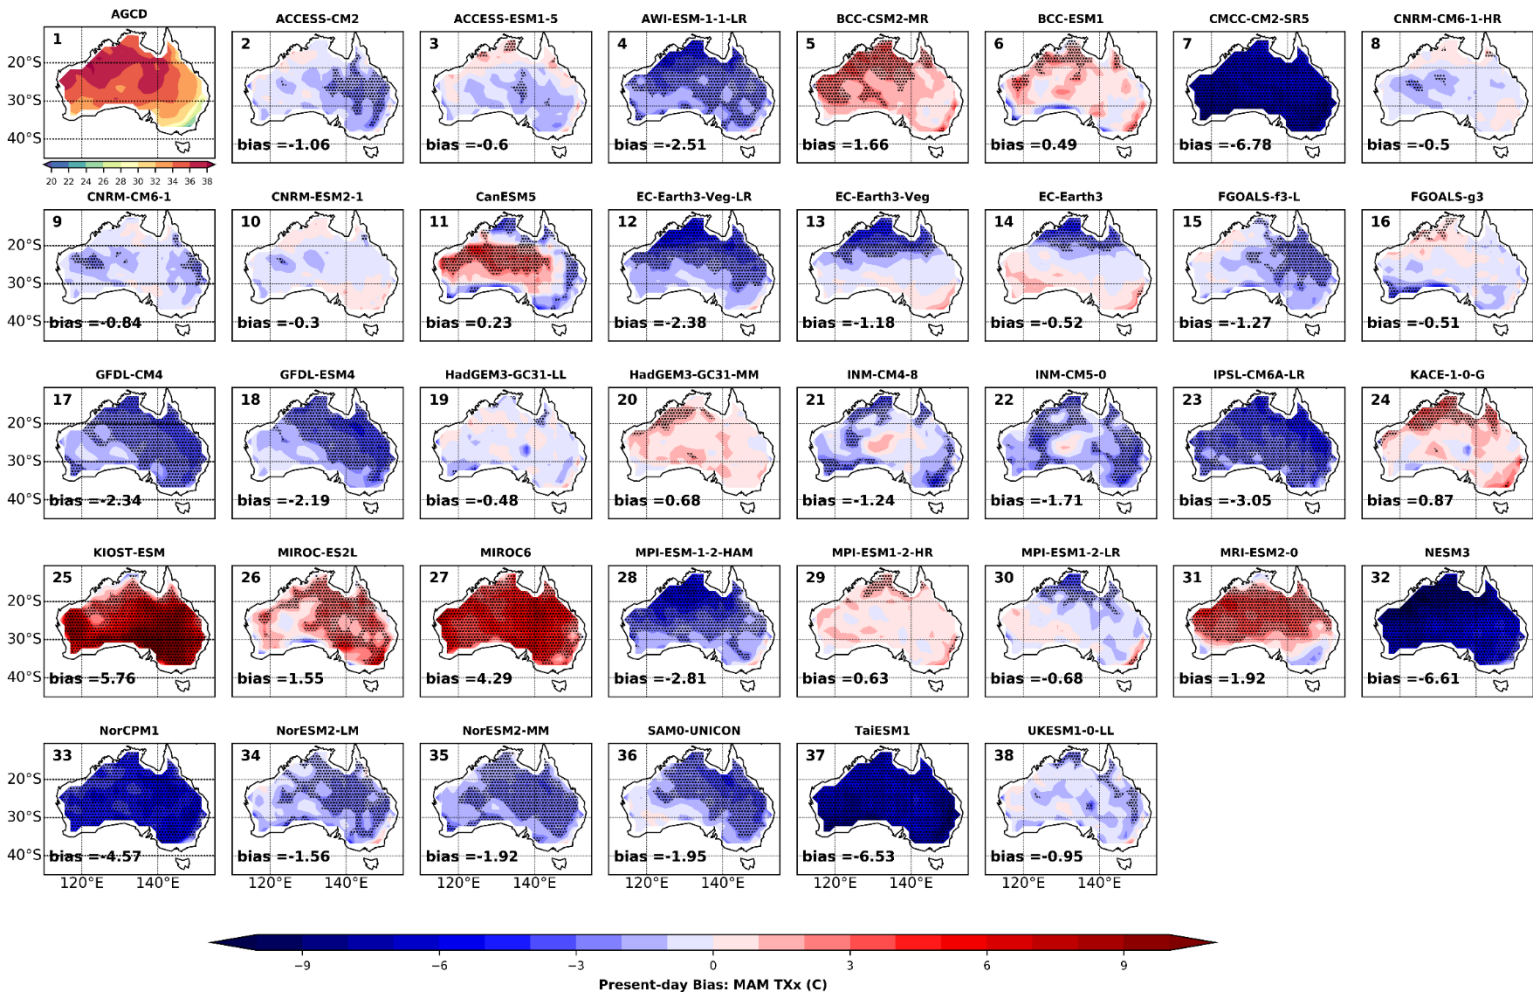

Figure S18. Same as S17 but for March-April-May.

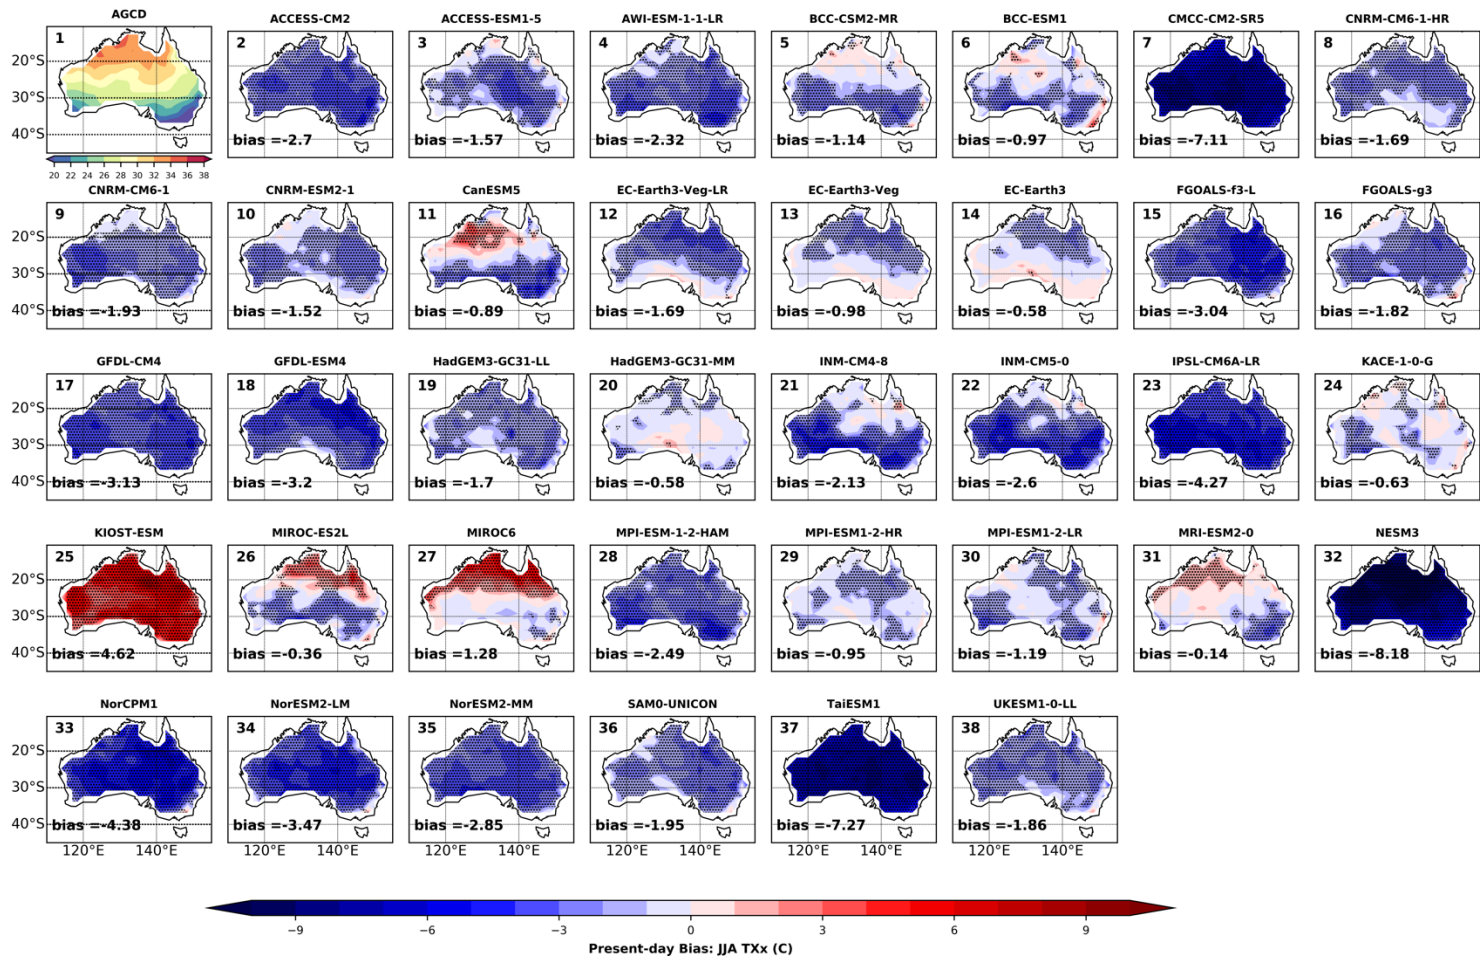

Figure S19. Same as S17 but for June-July-August.

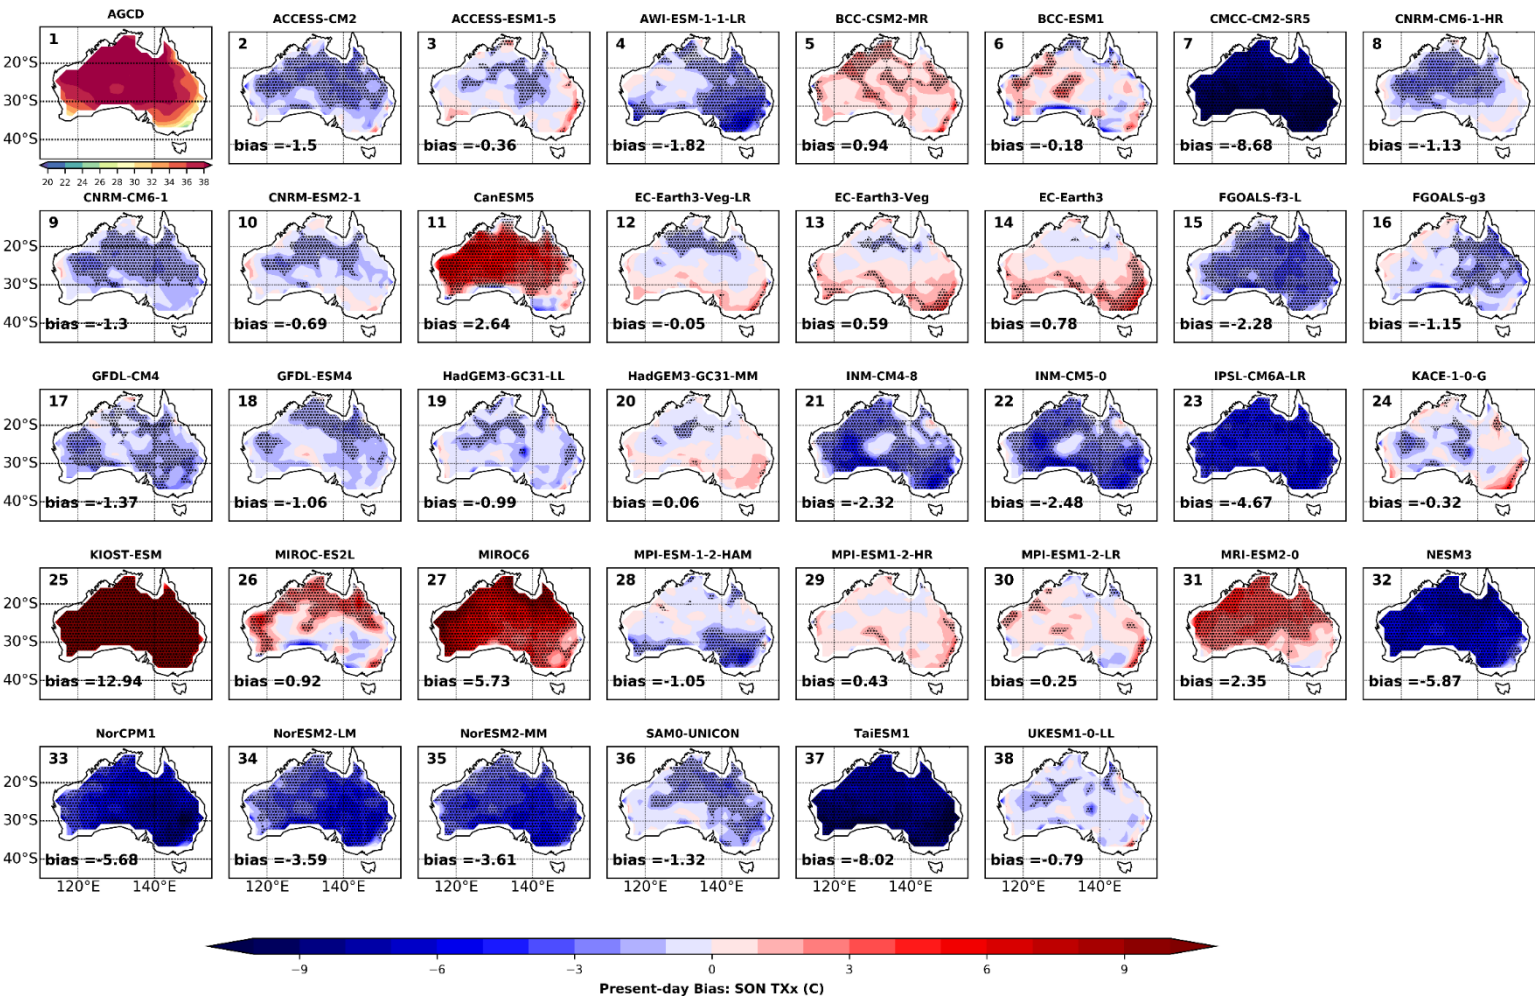

Figure S20. Same as S17 but for September-October-November.

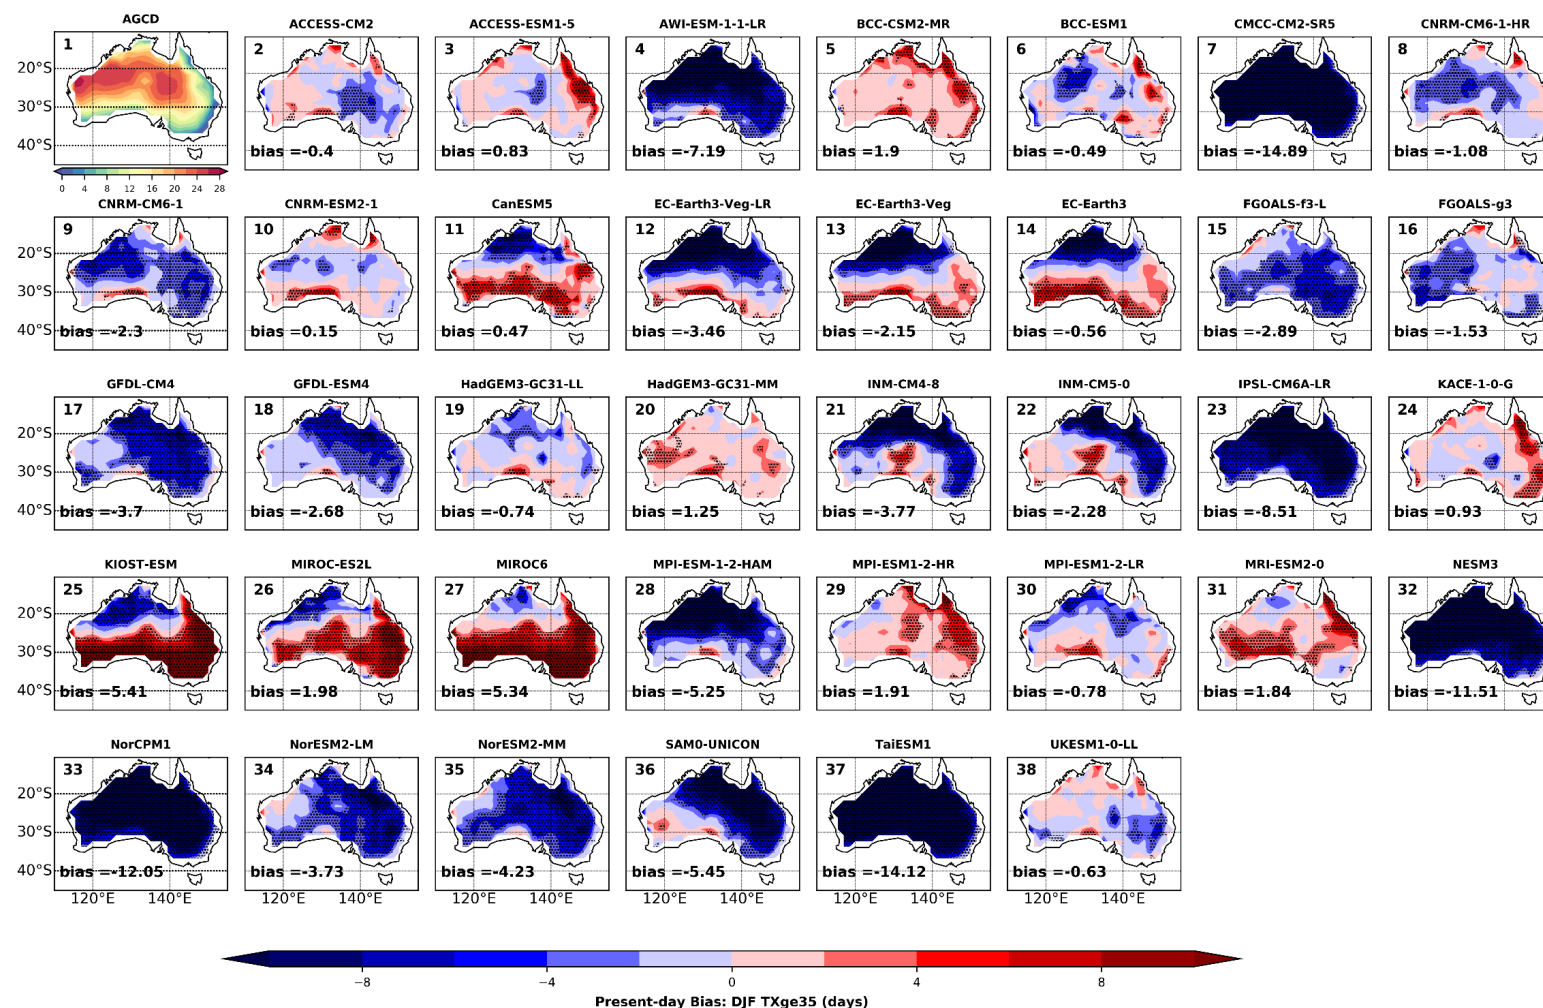

**Figure S21.** Climatological mean December-January-February bias in number of days when maximum temperature is greater than 35°C (Txge35: days) relative to Australian Gridded Climate Data dataset (AGCD; panel 1), for the individual CMIP6 GCMs (panels 2-38). Data spans 1951–2014. Stippling indicates statistically significant differences using a student's t-test at the 95% confidence level. The white mask in part of the inland domain are the regions with no station data.

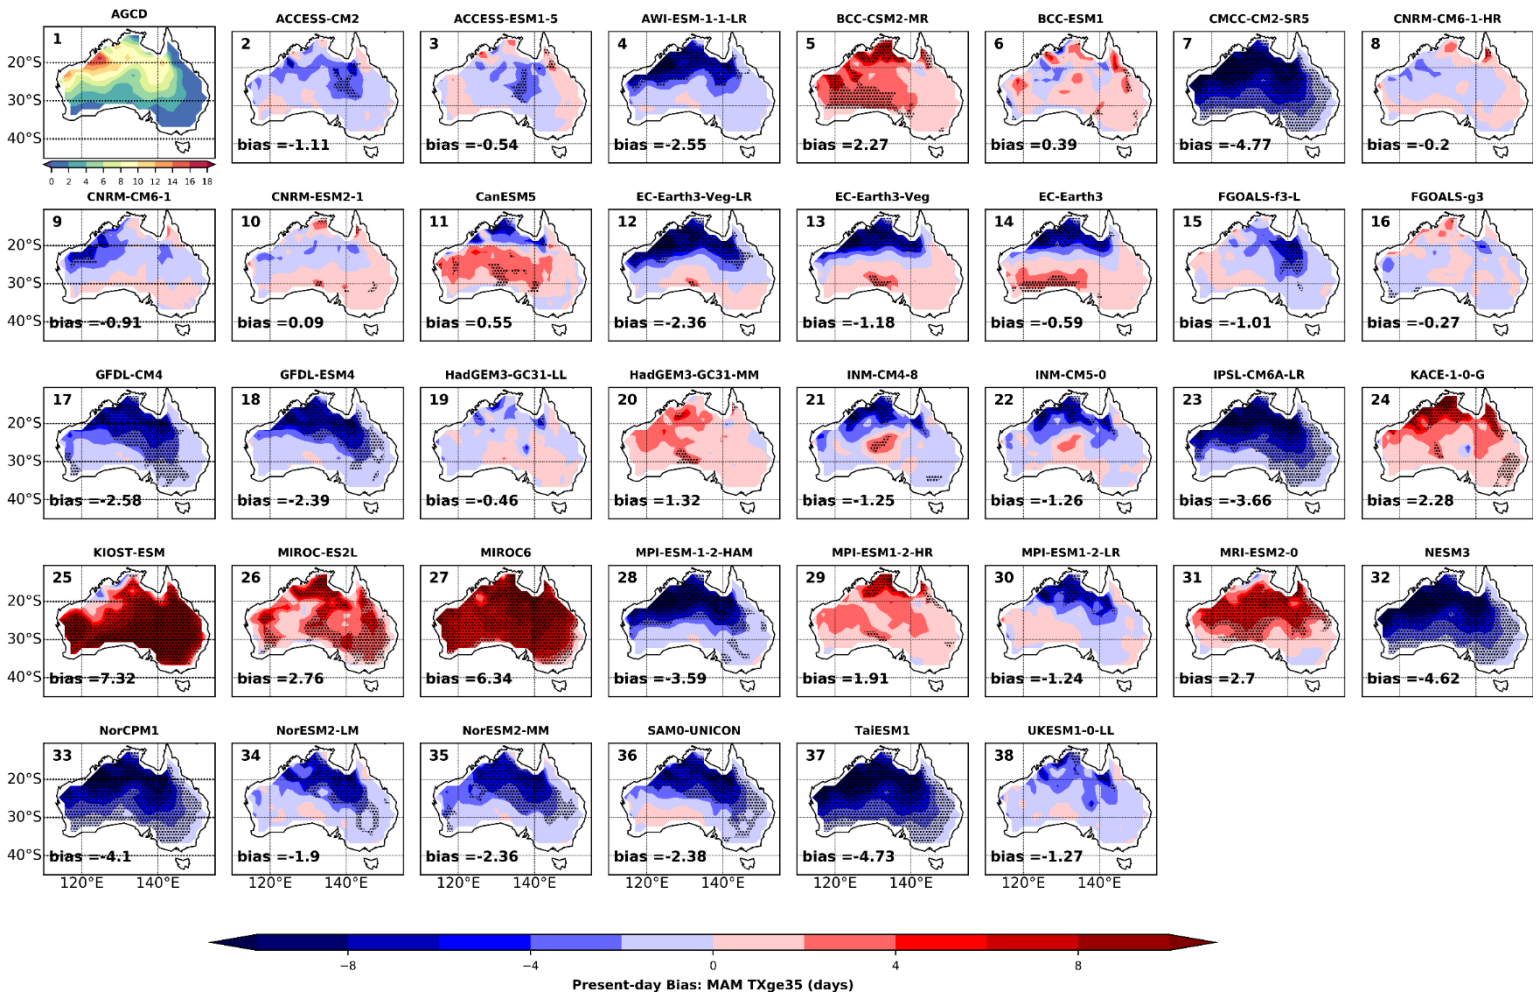

Figure S22. Same as S21 but for March-April-May.

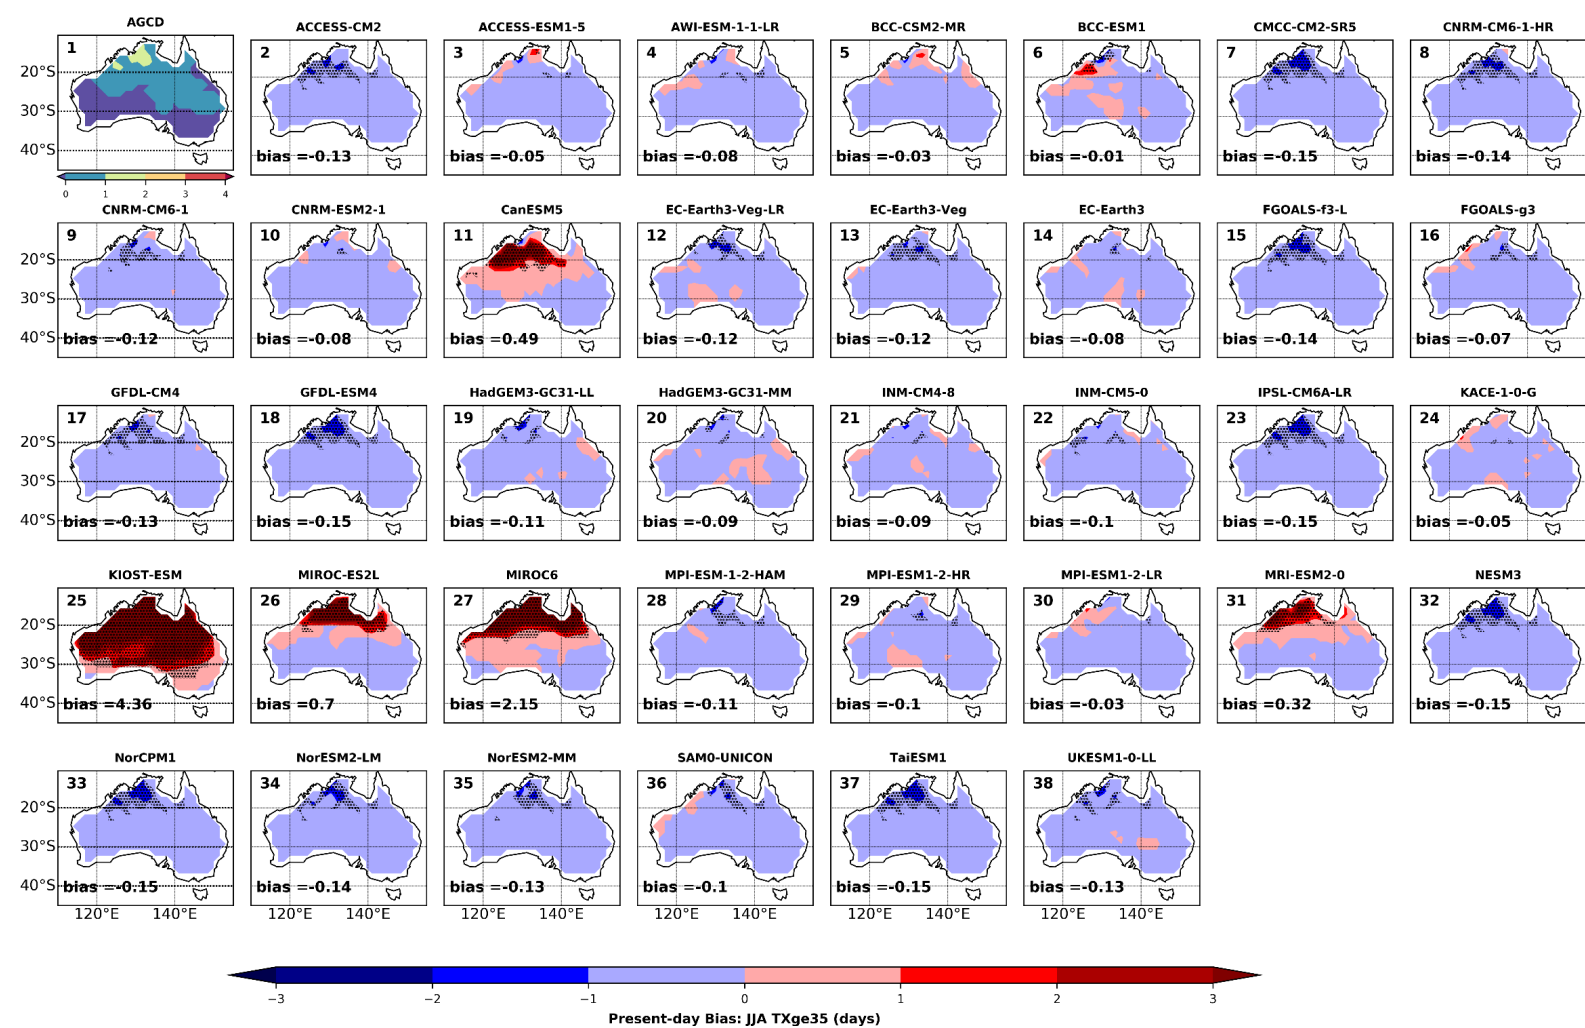

Figure S23. Same as S21 but for June-July-August.

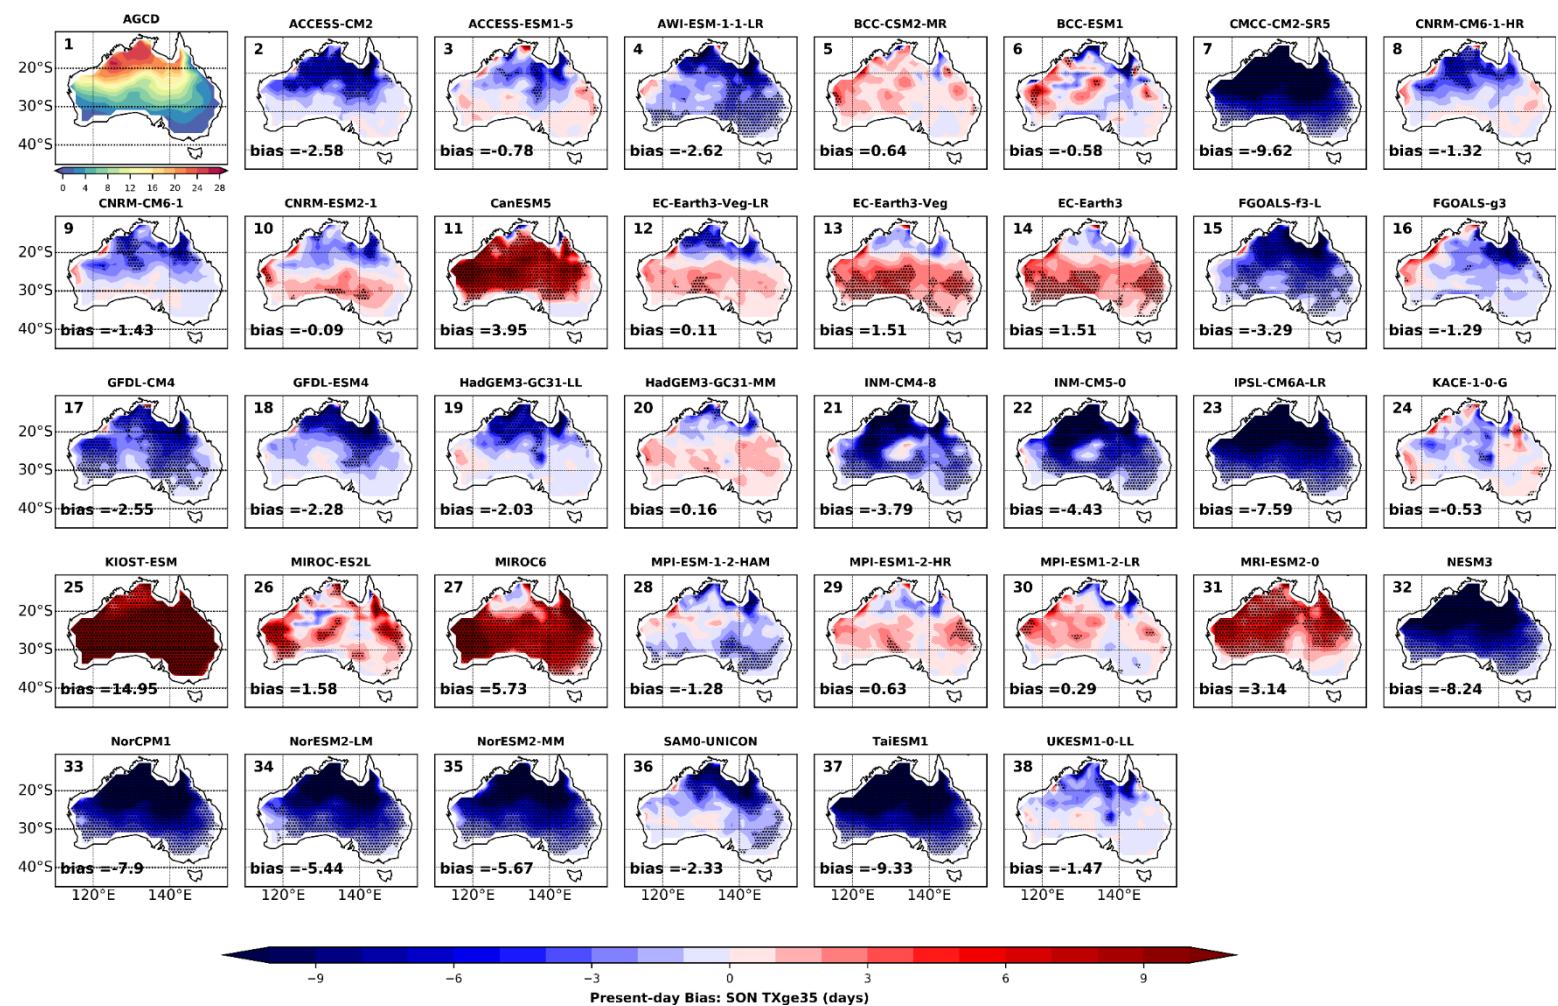

Figure S24. Same as S21 but for September-October-November.

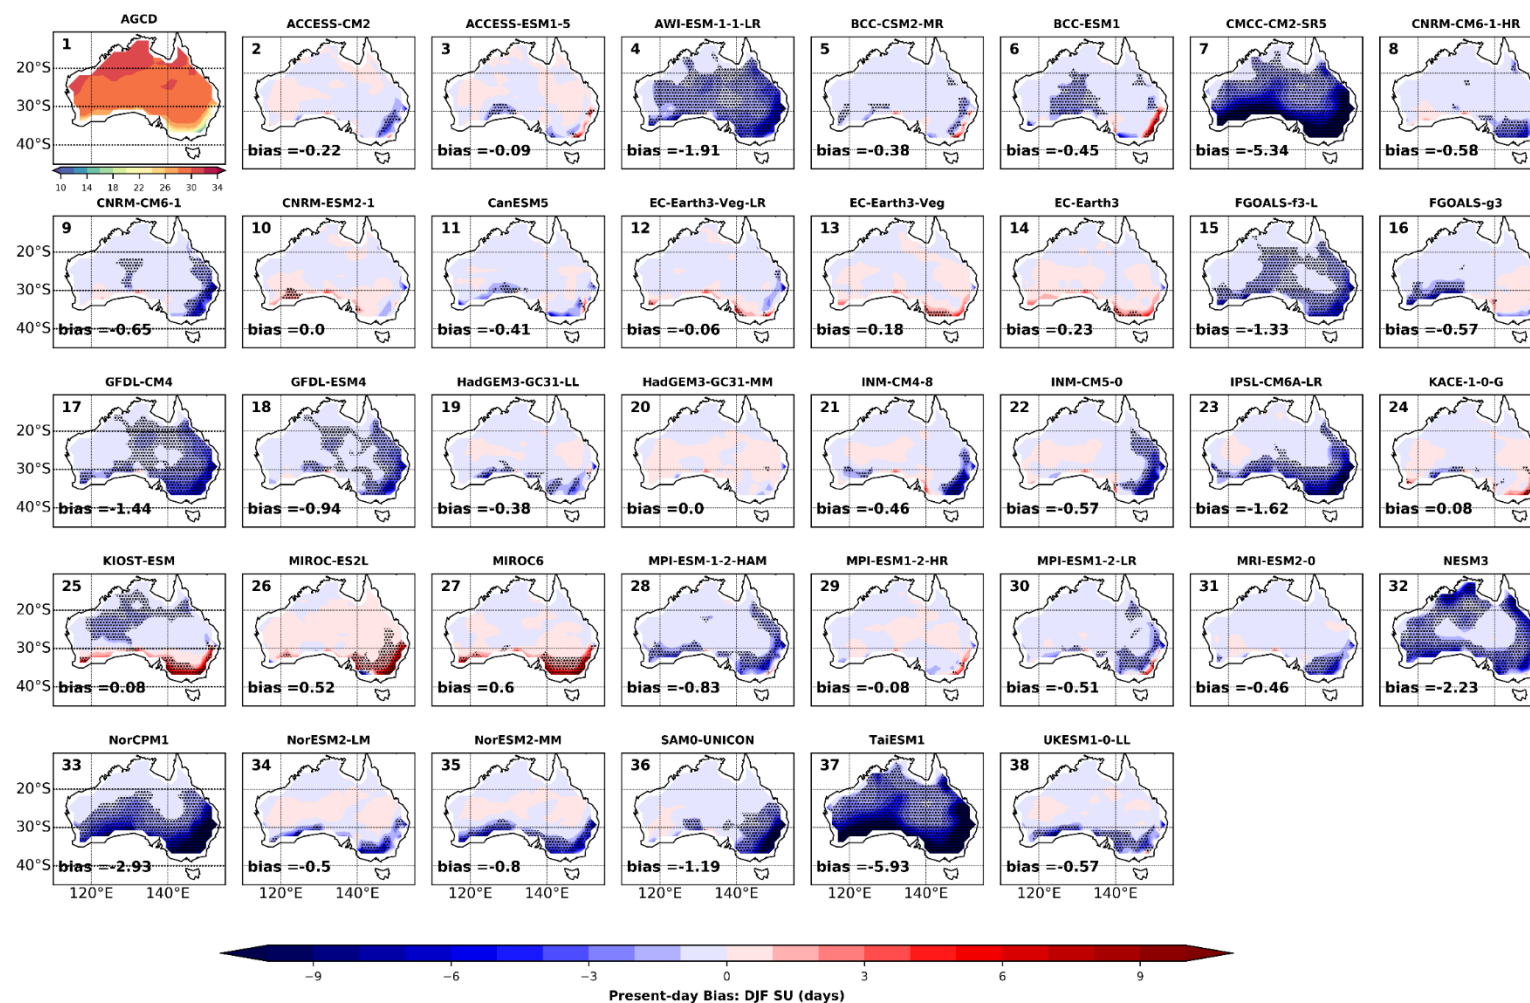

**Figure S25.** Climatological mean December-January-February bias in summer days (number of days when maximum temperature > 25 °C) (SU: days) relative to Australian Gridded Climate Data dataset (AGCD; panel 1), for the individual CMIP6 GCMs (panels 2-38). Data spans 1951–2014. Stippling indicates statistically significant differences using a student's t-test at the 95% confidence level. The white mask in part of the inland domain are the regions with no station data.

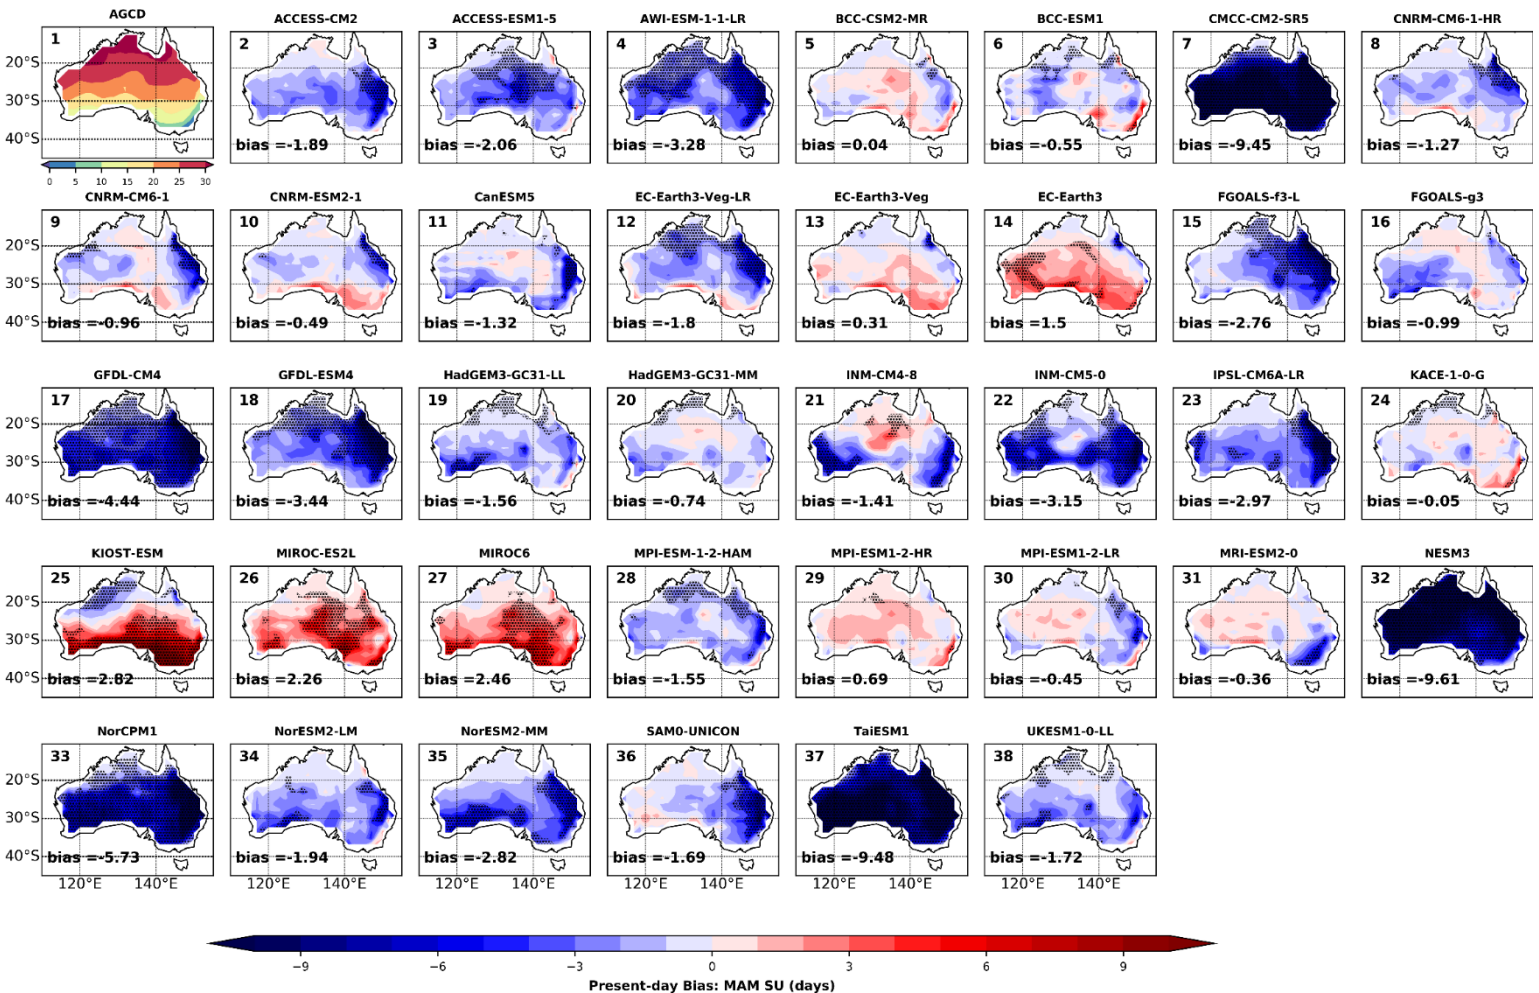

Figure S26. Same as S25 but for March-April-May.

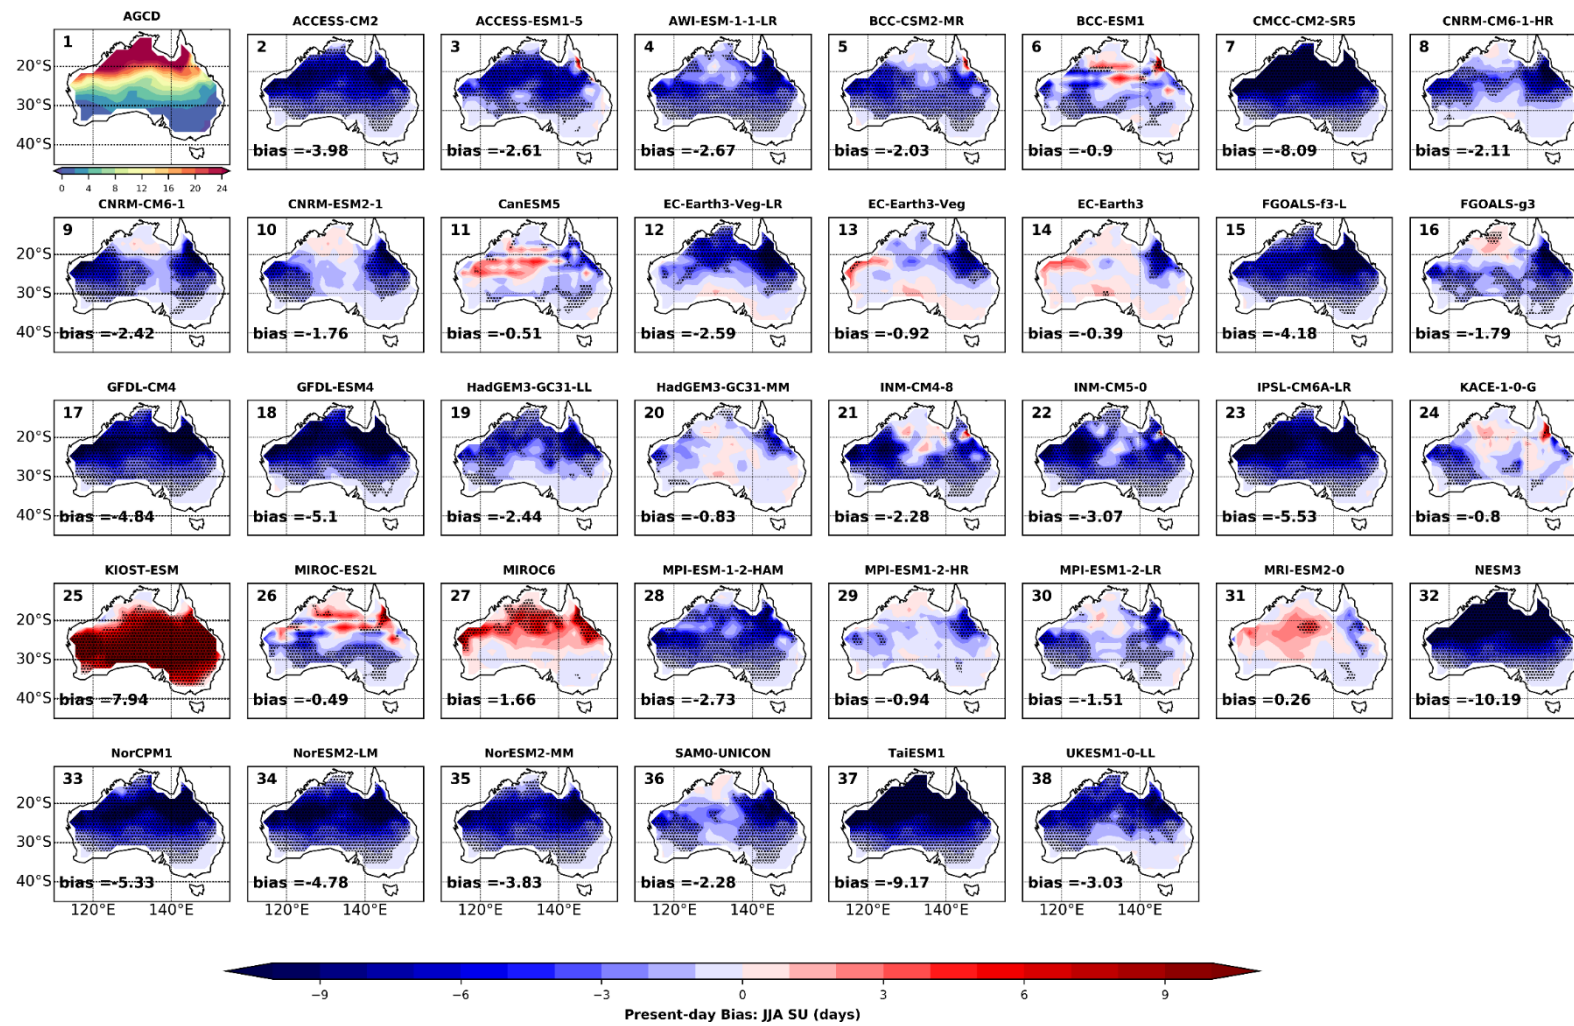

Figure S27. Same as S25 but for June-July-August.

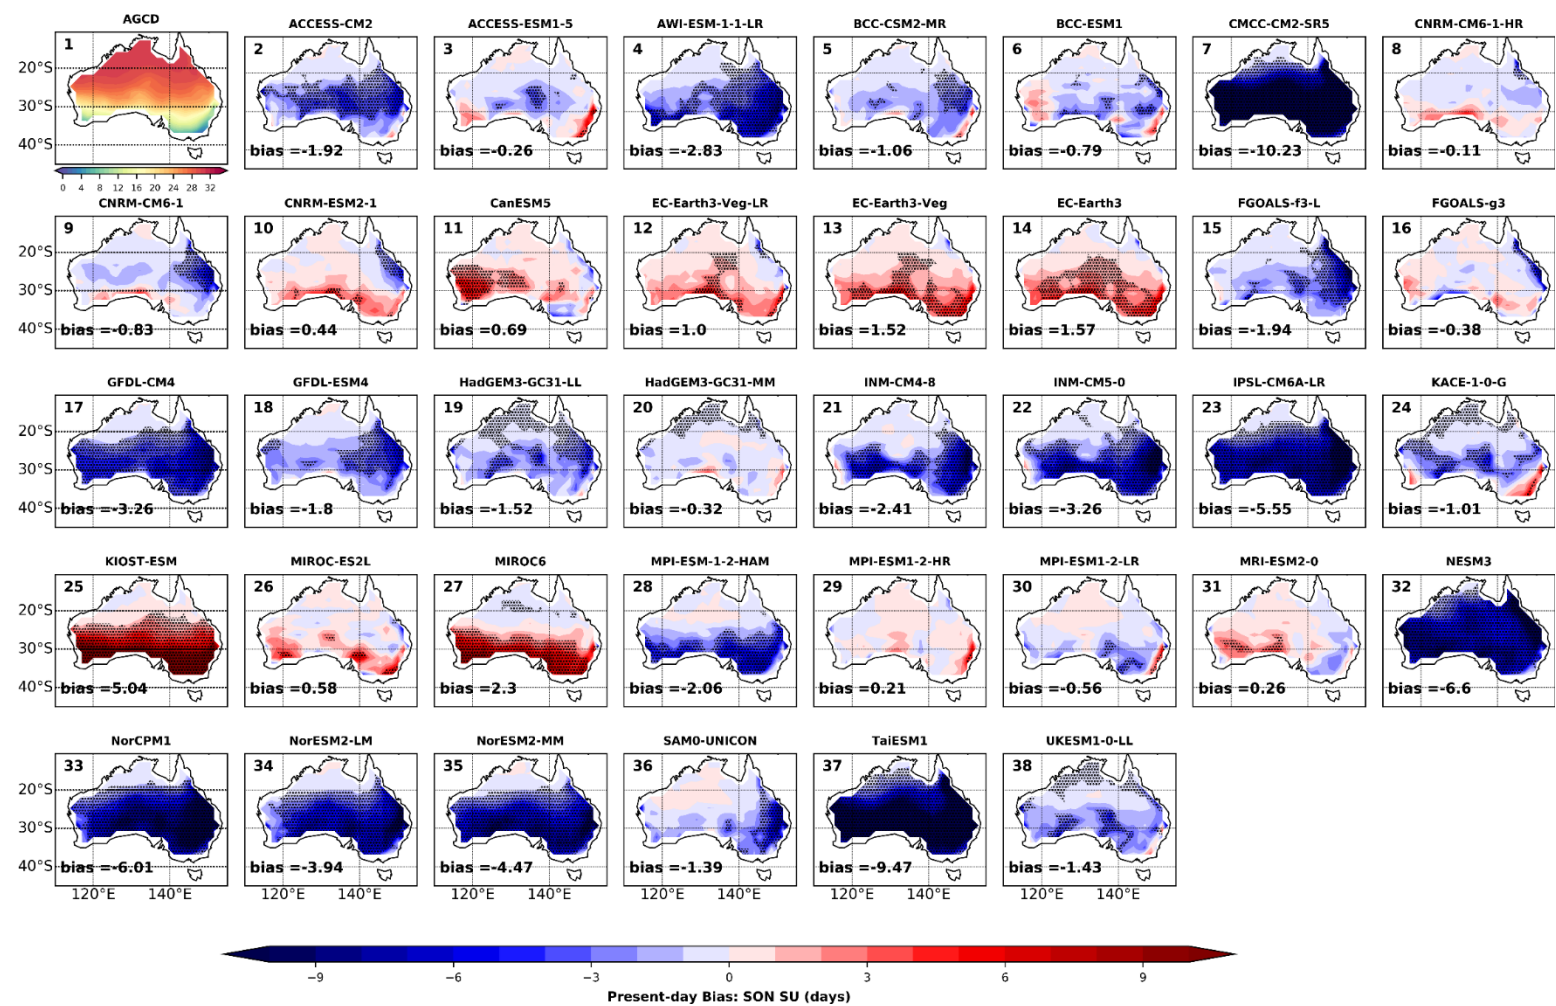

Figure S28. Same as S25 but for September-October-November.

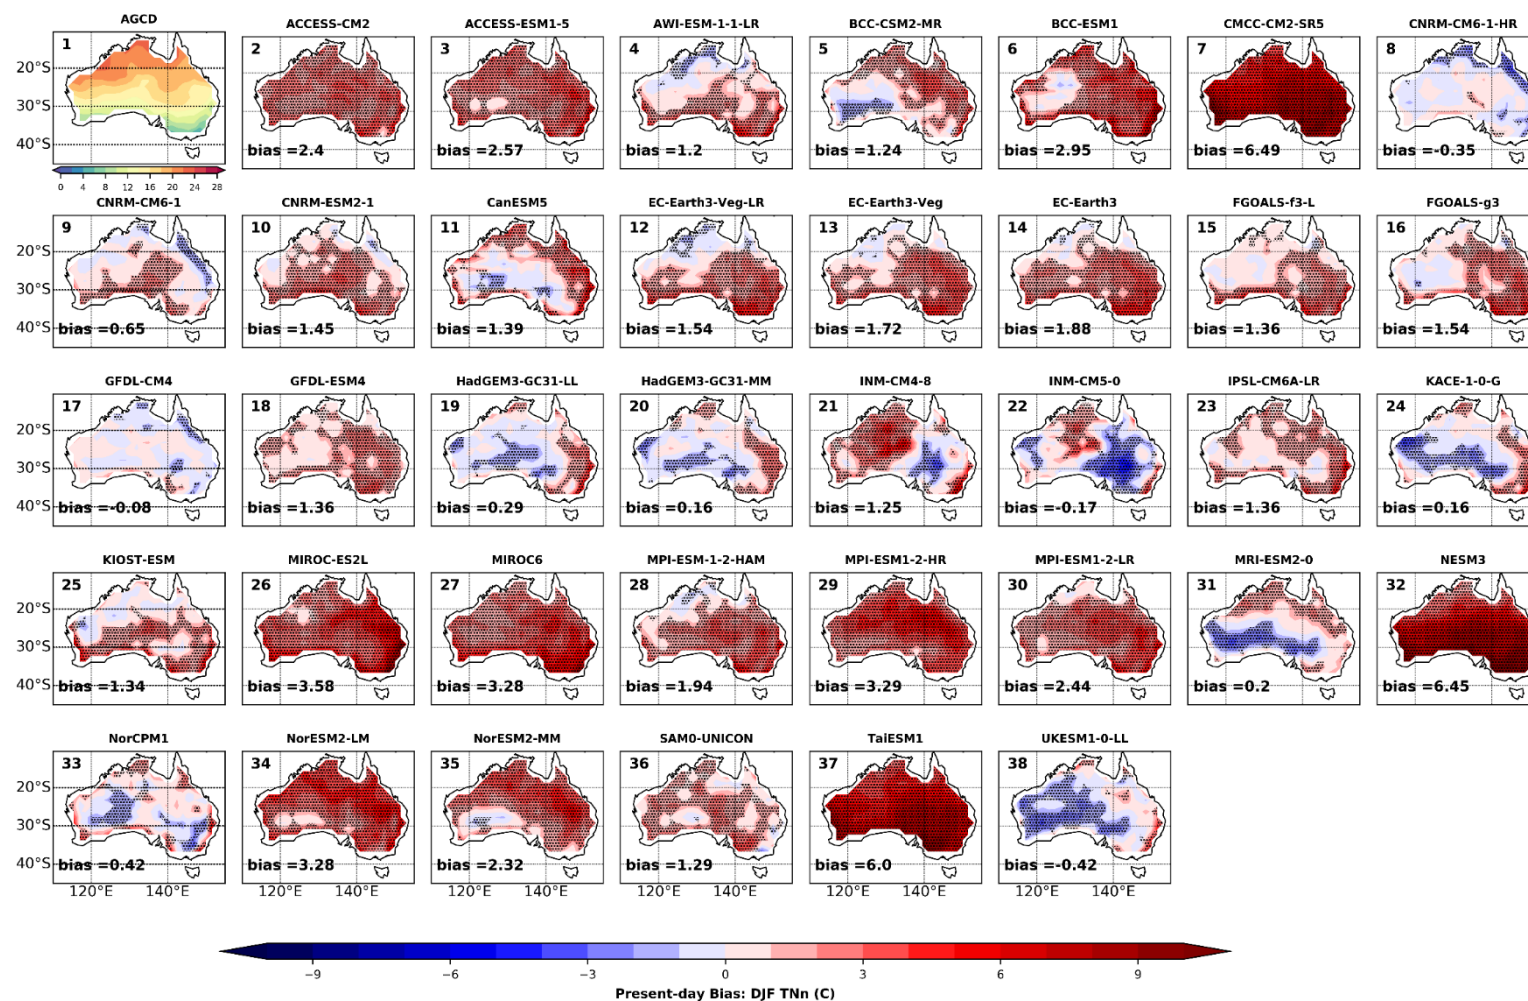

**Figure S29.** Climatological mean December-January-February bias in minimum minimum-temperature (TNn: °C) relative to Australian Gridded Climate Data dataset (AGCD; panel 1), for the individual CMIP6 GCMs (panels 2-38). Data spans 1951–2014. Stippling indicates statistically significant differences using a student's t-test at the 95% confidence level. The white mask in part of the inland domain are the regions with no station data.

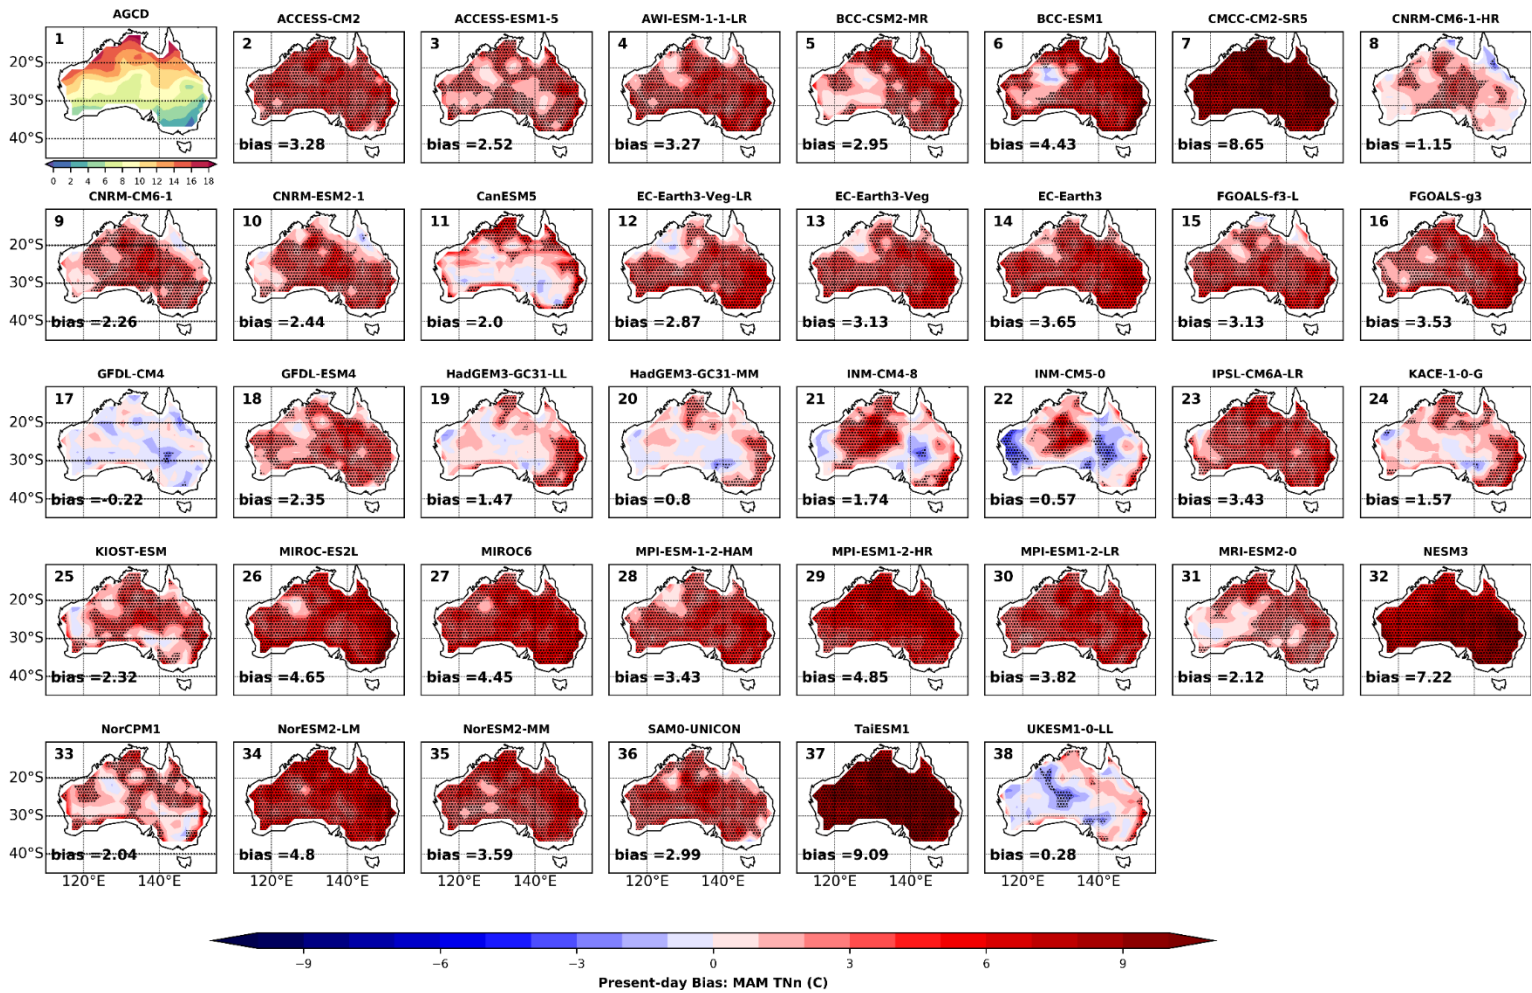

Figure S30. Same as S29 but for March-April-May.

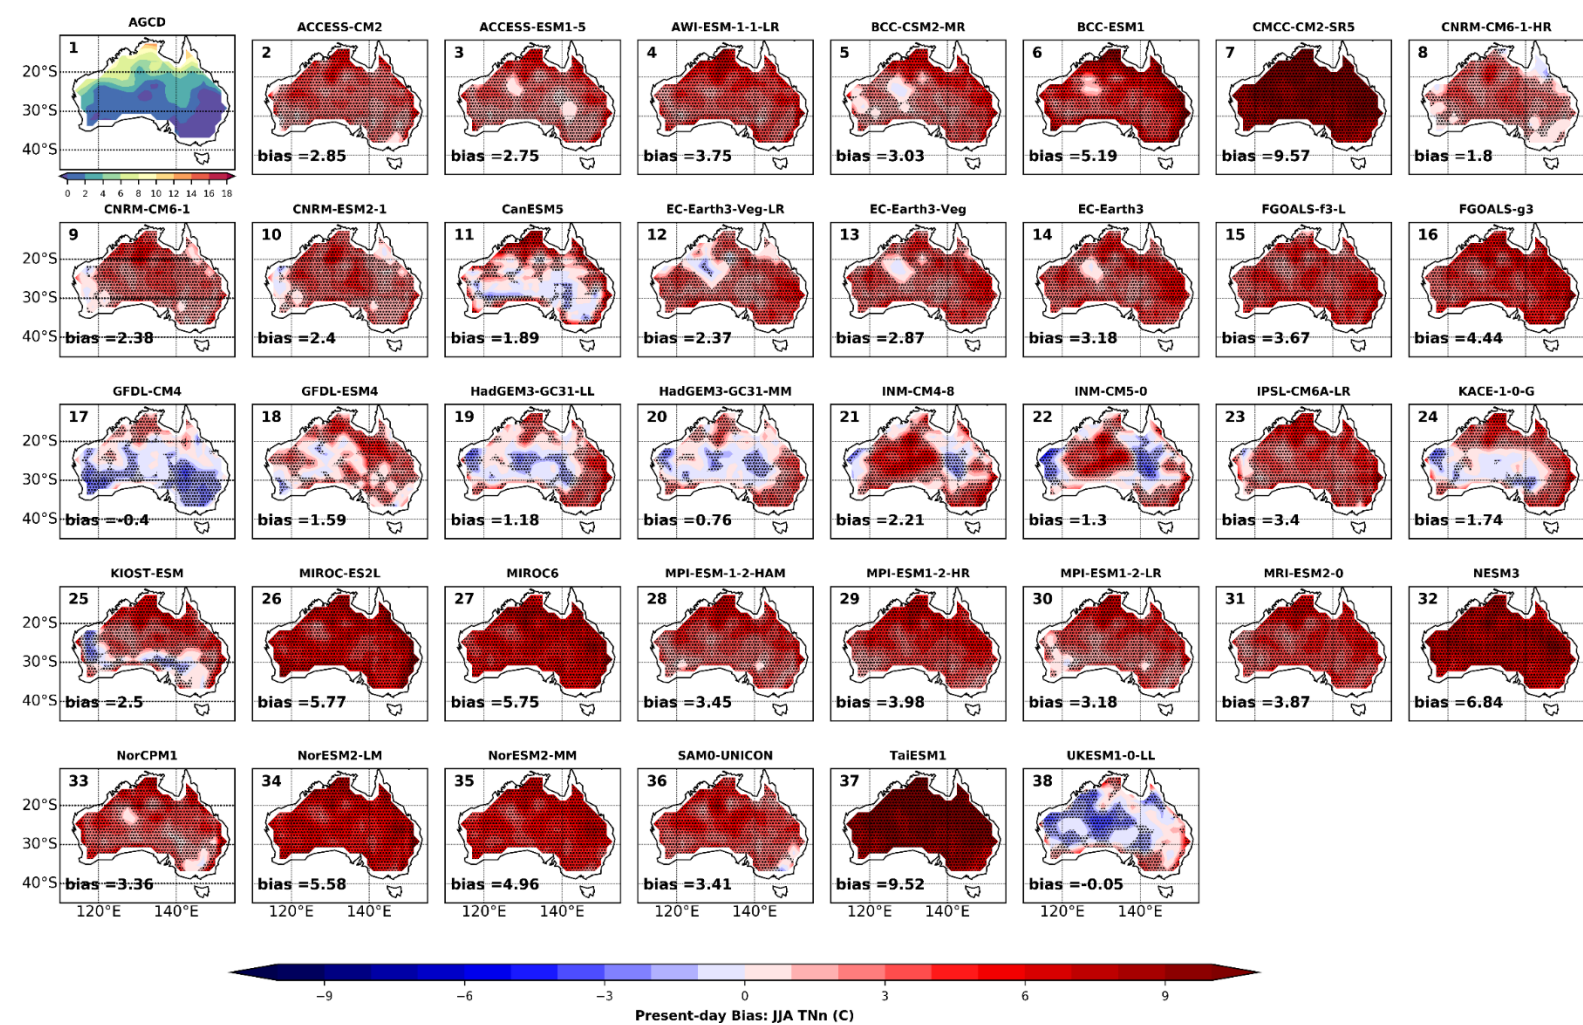

Figure S31. Same as S29 but for June-July-August.

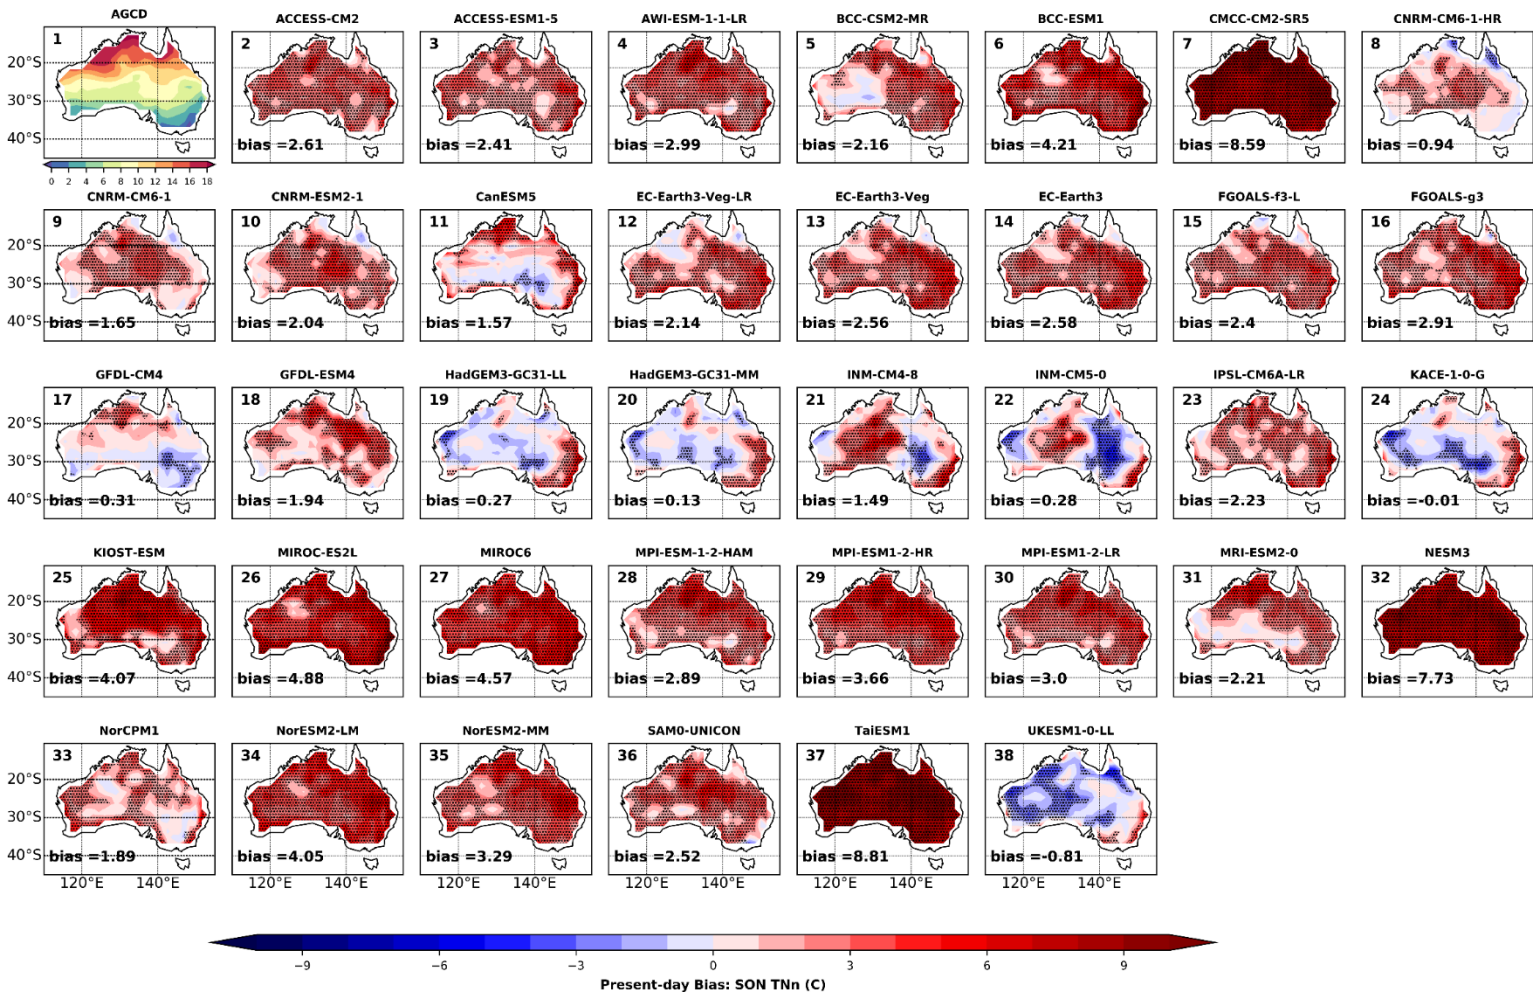

Figure S32. Same as S29 but for September-October-November.

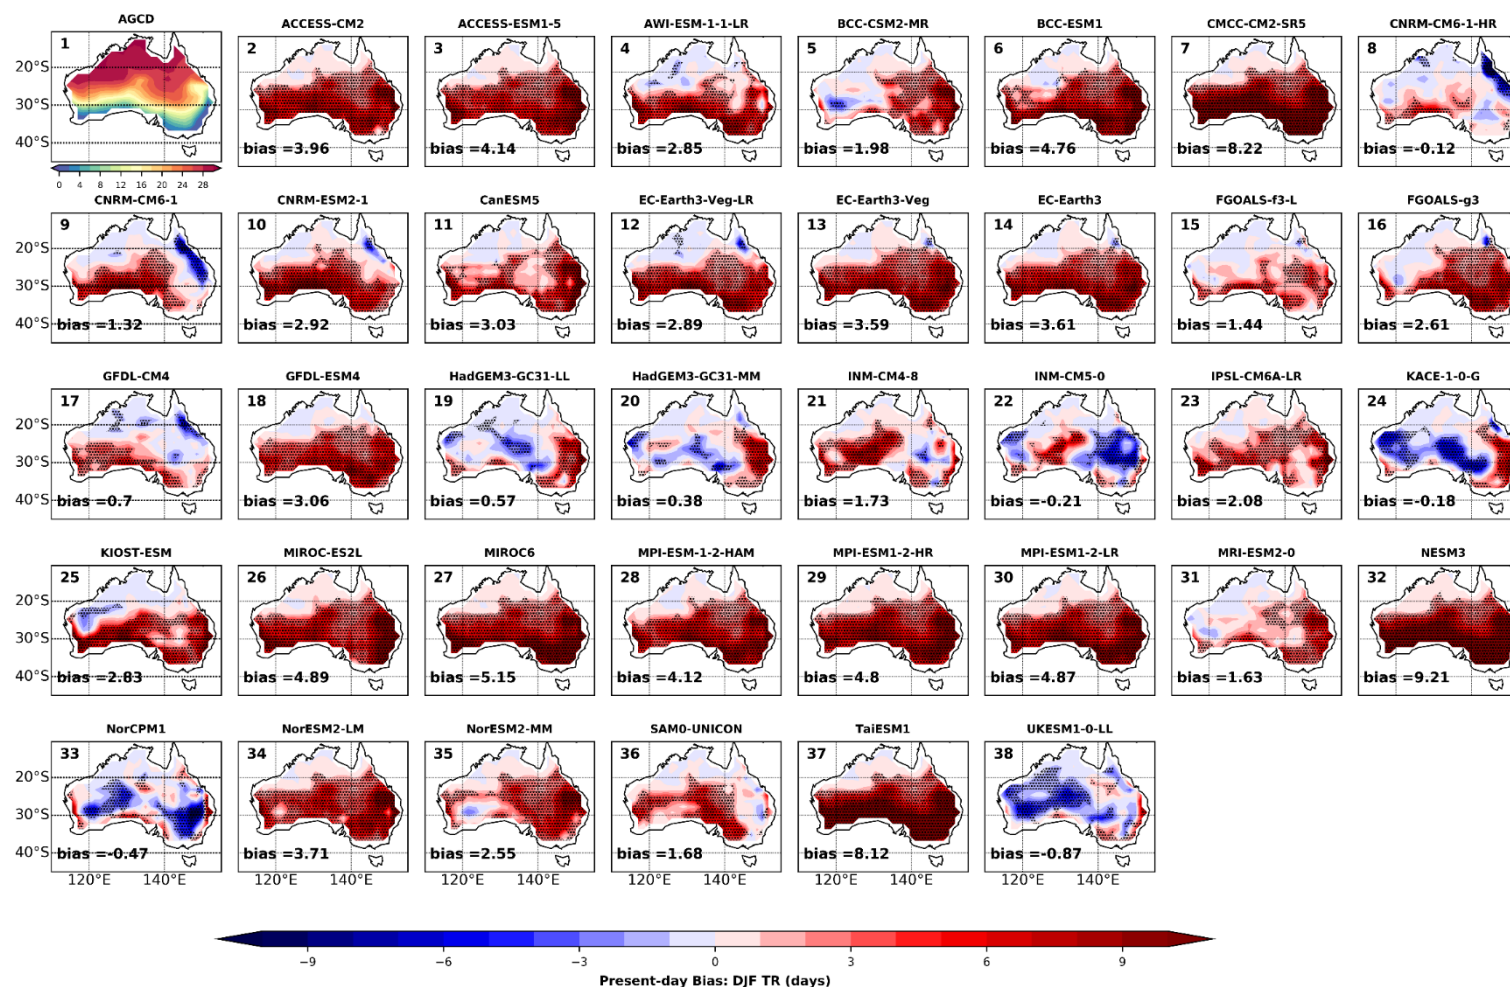

**Figure S33.** Climatological mean December-January-February bias in tropical nights (number of days when minimum temperature > 20 °C (TR: days) relative to Australian Gridded Climate Data dataset (AGCD; panel 1), for the individual CMIP6 GCMs (panels 2-38). Data spans 1951–2014. Stippling indicates statistically significant differences using a student's t-test at the 95% confidence level. The white mask in part of the inland domain are the regions with no station data.

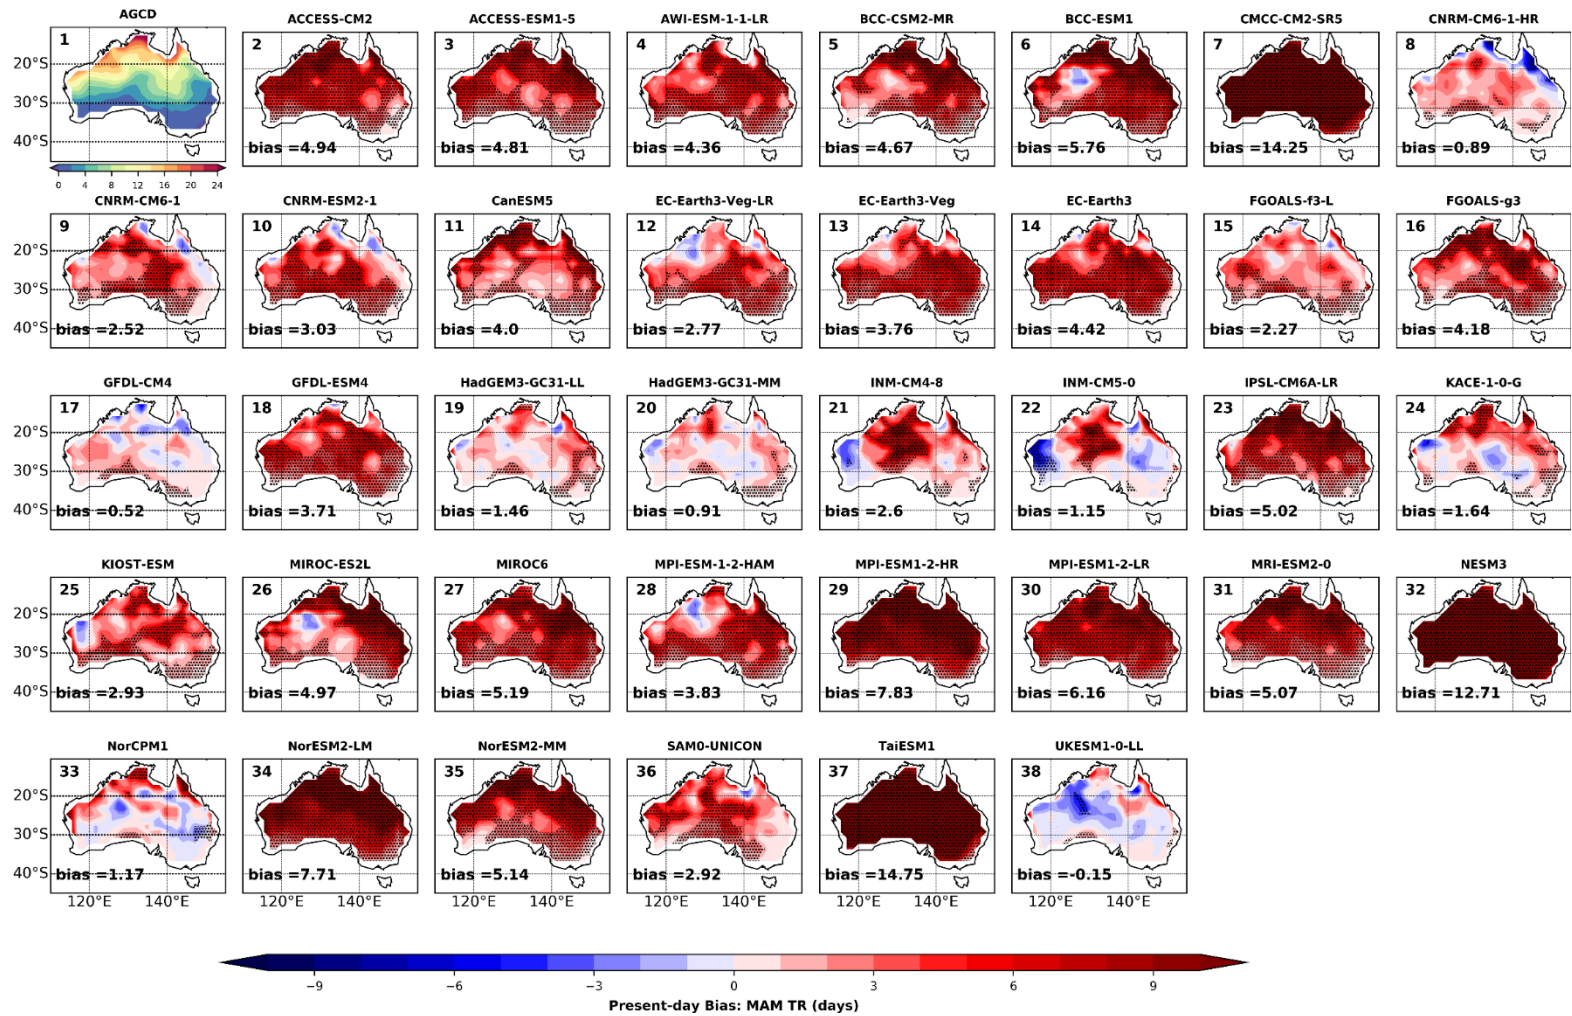

Figure S34. Same as S33 but for March-April-May.

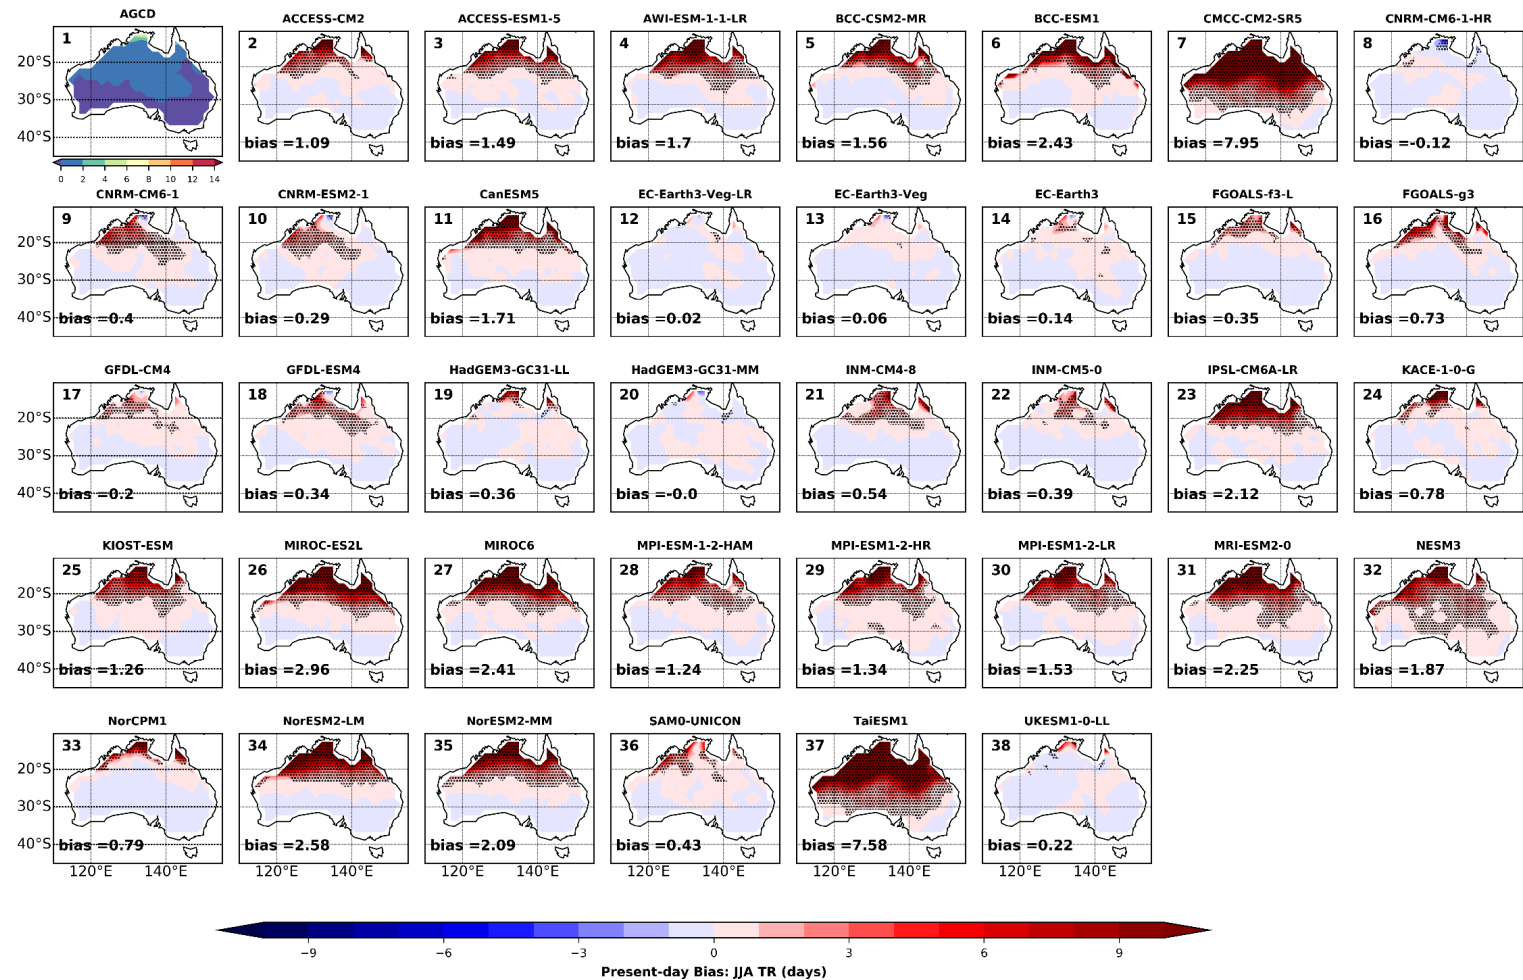

Figure S35. Same as S33 but for June-July-August.

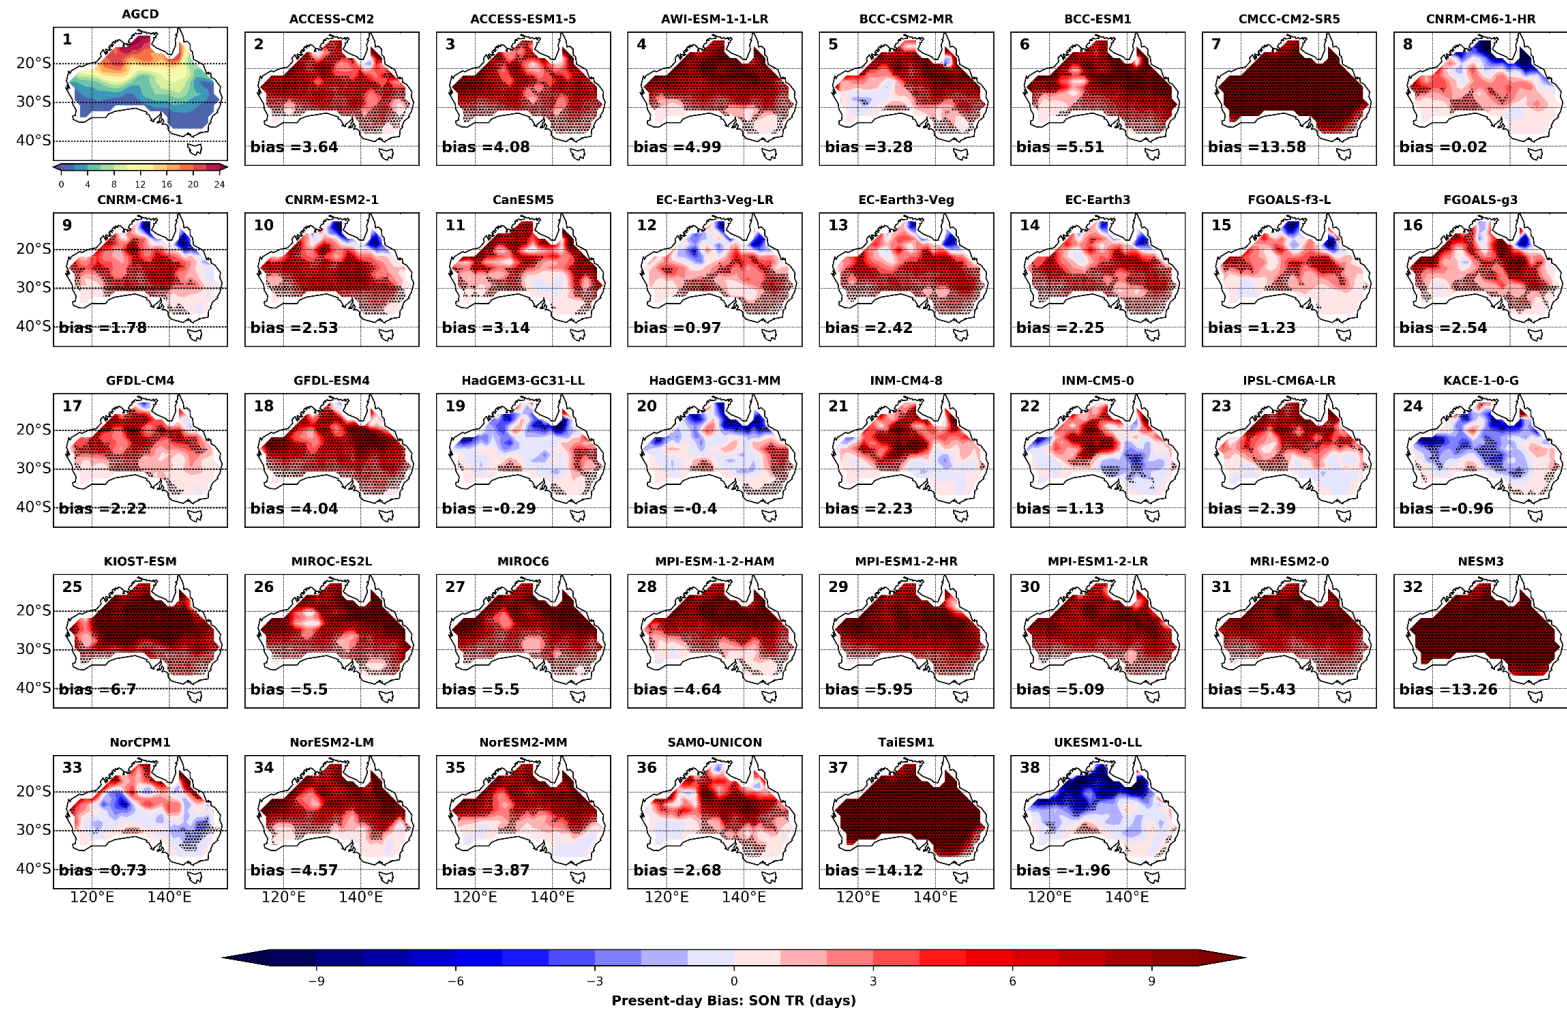

Figure S36. Same as S33 but for September-October-November.

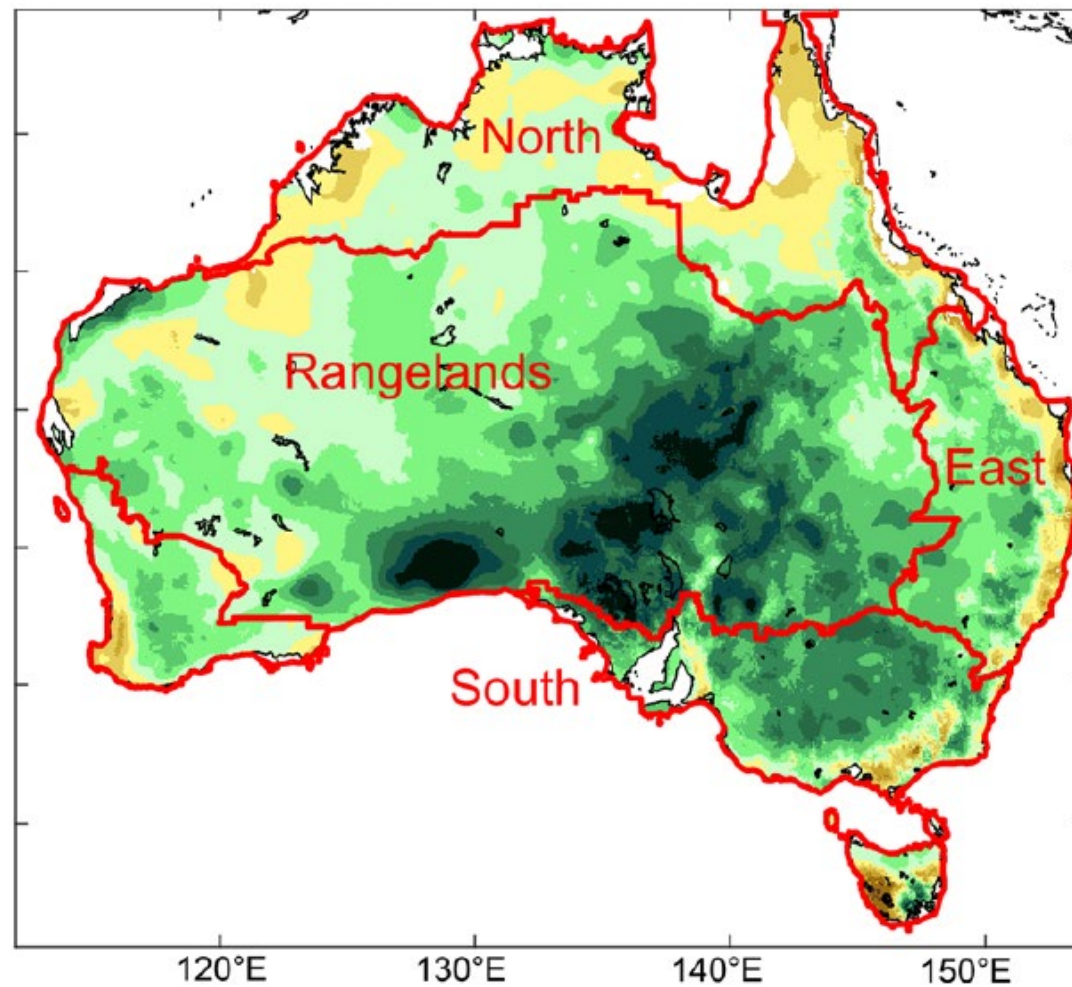

**Figure S37.** (Figure 3 from Grose et al. 2020). Here red lines indicate the borders of the four “supercluster” averaging regions: Northern Australia (North), Rangelands (Centre), Southern Australia (South), Eastern Australia (East). Given that there is a substantial distinction between the coastal (temperate) East, versus the semi-arid inland East.
